# Supplementary material for: Insight into the Peopling of Mainland Southeast Asia from Thai Population Genetic Structure
Source: PLoS One. 2013 Nov 4;8(11):e79522. doi: 10.1371/journal.pone.0079522 (PMC3817124; doi:10.1371/journal.pone.0079522)
Supplement: Table S2 — Correspondence of individual ipPCA-assignments of SP19-22 with SPA-D. (XLSX) [file pone.0079522.s006.xlsx]

## Sheet: Sheet1
40K/500K	SPA	SPB	SPC	SPD
SP19	214	79	1	3
SP20	0	271	65	0
SP21	8	11	184	44
SP22	2	0	0	90
