# Supplementary material for: Insight into the Peopling of Mainland Southeast Asia from Thai Population Genetic Structure
Source: PLoS One. 2013 Nov 4;8(11):e79522. doi: 10.1371/journal.pone.0079522 (PMC3817124; doi:10.1371/journal.pone.0079522)
Supplement: Table S3 — Top 50 rank SNP from Chi-squared analysis between Thalassemia dataset and the Major depressive disorder dataset from the expected ratio for all markers. (XLSX) [file pone.0079522.s007.xlsx]

## Sheet: Sheet1
CHR	SNP	BP	A1	F_A	F_U	A2	CHISQ	P	OR
2	rs1474406	141516543	1	0.7794	0.6699	2	27.21	1.828e-07	1.741
5	rs4703164	100974014	2	0.05496	0.01629	1	23.18	1.477e-06	3.513
10	rs313437	4674042	2	0.09358	0.04126	1	22.27	2.363e-06	2.399
4	rs1012617	82096963	2	0.4584	0.356	1	20.44	6.14e-06	1.531
10	rs1937655	53228313	2	0.25	0.1667	1	20.37	6.375e-06	1.667
15	rs17687882	40020369	2	0.01604	0	1	19.95	7.951e-06	NA
17	rs9910961	73341718	1	0.5709	0.4676	2	19.86	8.324e-06	1.514
7	rs9801492	146175425	2	0.1898	0.1173	1	19.81	8.554e-06	1.763
16	rs13337856	84883355	2	0.2487	0.1667	1	19.76	8.773e-06	1.655
22	rs16985150	20855600	2	0.03743	0.08981	1	19.62	9.456e-06	0.3941
1	rs3817436	235989866	2	0.1524	0.08819	1	19.26	1.139e-05	1.859
17	rs721411	36902470	2	0.2888	0.2031	1	19.01	1.298e-05	1.593
21	rs4819342	43576609	2	0.01471	0	1	18.28	1.909e-05	NA
12	rs837948	123568478	1	0.5789	0.4806	2	18.03	2.173e-05	1.486
1	rs10494377	161115379	2	0.0615	0.1197	1	17.92	2.305e-05	0.4817
18	rs620837	276971	2	0.4826	0.3859	1	17.86	2.378e-05	1.484
19	rs17272882	58375830	2	0.03075	0.006472	1	17.85	2.384e-05	4.87
16	rs7200972	52593853	1	0.626	0.5291	2	17.77	2.491e-05	1.49
17	rs2098026	13411022	2	0.238	0.3261	1	17.46	2.936e-05	0.6455
22	rs4820707	25509453	2	0.143	0.08347	1	17.45	2.947e-05	1.833
13	rs9318318	74602834	2	0.3021	0.2184	1	17.41	3.015e-05	1.549
2	rs10497212	160672946	2	0.1283	0.2015	1	17.34	3.124e-05	0.5836
4	rs4552442	25815036	2	0.2901	0.2079	1	17.31	3.18e-05	1.557
16	rs2111118	52606654	1	0.6324	0.5372	2	17.24	3.296e-05	1.482
16	rs1125338	52599280	1	0.6243	0.5291	2	17.19	3.39e-05	1.479
12	rs201430	97723329	2	0.2447	0.3325	1	17.15	3.447e-05	0.6502
8	rs7003874	97607128	2	0.1872	0.1197	1	17.07	3.599e-05	1.693
5	rs10491294	133018222	2	0.1604	0.2379	1	16.92	3.895e-05	0.6122
2	rs17314196	176405988	2	0.1003	0.1667	1	16.9	3.942e-05	0.5572
2	rs859750	89753412	2	0.1613	0.09869	1	16.9	3.947e-05	1.756
12	rs2036225	97714503	2	0.25	0.3374	1	16.8	4.149e-05	0.6547
8	rs7815159	4886423	2	0.1885	0.1214	1	16.78	4.186e-05	1.682
14	rs1952535	83229087	2	0.1163	0.06392	1	16.69	4.413e-05	1.928
2	rs16844790	160676874	2	0.1297	0.2015	1	16.67	4.438e-05	0.5906
5	rs4958132	133019176	2	0.1604	0.2371	1	16.6	4.616e-05	0.615
10	rs7916284	66829575	2	0.07353	0.03317	1	16.48	4.908e-05	2.313
7	rs13243618	128572244	2	0.1965	0.2775	1	16.43	5.04e-05	0.6368
19	rs2870525	33918644	2	0.3253	0.4167	1	16.43	5.051e-05	0.6749
2	rs1445657	155343228	2	0.02941	0.006483	1	16.42	5.064e-05	4.644
16	rs1345390	52602016	1	0.6364	0.5437	2	16.41	5.089e-05	1.469
10	rs4935020	53202474	2	0.2447	0.1699	1	16.39	5.152e-05	1.582
3	rs9868266	112820859	2	0.2976	0.2168	1	16.3	5.397e-05	1.53
3	rs12492363	71345926	2	0.07086	0.03155	1	16.28	5.471e-05	2.341
6	rs12111167	93111991	2	0.04679	0.01618	1	16.2	5.701e-05	2.985
7	rs7785453	121835590	2	0.5241	0.4312	1	16.13	5.904e-05	1.453
1	rs3927580	54557304	2	0.3155	0.4053	1	16.11	5.989e-05	0.6762
3	rs9844901	161909424	2	0.09225	0.04693	1	15.97	6.419e-05	2.064
4	rs10003871	142479872	2	0.512	0.4199	1	15.95	6.496e-05	1.45
16	rs4369659	80529178	2	0.3275	0.4175	1	15.94	6.535e-05	0.6796
1	rs12134032	47732840	2	0.1711	0.2476	1	15.94	6.55e-05	0.6275
