# Supplementary material for: Insight into the Peopling of Mainland Southeast Asia from Thai Population Genetic Structure
Source: PLoS One. 2013 Nov 4;8(11):e79522. doi: 10.1371/journal.pone.0079522 (PMC3817124; doi:10.1371/journal.pone.0079522)
Supplement: Table S4 — Top 200 ranked SNPs based on Fst values for all pair-wise comparisons between SPA, SPB, SPC and SPD. (XLSX) [file pone.0079522.s008.xlsx]

## Sheet: A-B
rsID	Chr	Position	Allele A	Allele B	Gene	Region	Position relative to gene	Fst values	Disease/Trait	PUBMEDID	GWAS Study
rs9356806	6	22312177	A	G	LOC729177	flanking_5UTR	-55697	0.039
rs10009368	4	135341051	A	G	LOC132430	coding	[539/573]	0.033
rs659230	18	39206628	T	G	SYT4	flanking_5UTR	-95286	0.033
rs13407210	2	29573723	T	C	ALK	intron	-34562	0.032
rs2414167	15	50694720	A	G	KIAA1370	intron	-1374	0.032
rs9808313	2	29574838	A	G	ALK	intron	-33447	0.031
rs2072954	20	9388840	A	G	PLCB4	intron	-383	0.031
rs4409444	9	9215463	A	G	PTPRD	flanking_5UTR	-206728	0.031
rs6473743	8	53873999	T	C	LOC644727	flanking_3UTR	-83074	0.031
rs1426654	15	46213776	A	G	SLC24A5	coding	[29/54]	0.031
rs2899492	15	50720554	A	G	KIAA1370	intron	-27208	0.031
rs4358452	4	135471248	T	C	LOC345016	flanking_3UTR	-1845	0.03
rs1017927	4	135481952	T	C	LOC345016	flanking_3UTR	-12549	0.03
rs2941386	18	64452096	A	C	TXNDC10	flanking_3UTR	-39809	0.03
rs12609898	19	62261724	A	G	USP29	flanking_5UTR	-63781	0.03
rs340778	2	16372889	T	C	FAM49A	flanking_3UTR	-224493	0.029
rs3135342	6	32504593	A	C	HLA-DRA	flanking_5UTR	-11032	0.029
rs2106794	17	13088410	A	G	ELAC2	flanking_5UTR	-226361	0.029
rs7675604	4	135484058	A	G	LOC345016	flanking_3UTR	-14655	0.029
rs2623190	15	97531848	A	G	TTC23	intron	-930	0.029
rs2593029	15	97413836	T	C	LOC728959	flanking_3UTR	-5958	0.029
rs11894986	2	16330668	T	C	FAM49A	flanking_3UTR	-266714	0.029
rs9791957	7	95063042	A	C	PDK4	intron	-370	0.029
rs1670262	15	97414876	A	G	LOC728959	flanking_3UTR	-4918	0.028
rs3912262	17	14233587	A	G	HS3ST3B1	flanking_3UTR	-43370	0.028
rs10044287	5	74131298	A	G	TINP1	flanking_3UTR	-22808	0.028
rs2530310	7	147748575	A	G	CNTNAP2	3UTR	[4933/444]	0.028
rs11592199	10	23020664	T	C	PIP4K2A	intron	-22454	0.028
rs17007422	2	119335391	T	G	EN1	flanking_5UTR	-13162	0.027
rs7318179	13	84942387	T	C	SLITRK6	flanking_3UTR	-322536	0.027
rs1426786	1	81313972	A	C	LOC646538	flanking_3UTR	-22532	0.027
rs4655141	1	23184612	A	G	LOC646262	flanking_5UTR	-12501	0.027
rs11602279	11	5166168	A	G	OR51V1	flanking_3UTR	-11373	0.027
rs2342227	13	84925872	A	G	SLITRK6	flanking_3UTR	-339051	0.027
rs4337777	4	135357410	T	C	LOC132430	flanking_5UTR	-15057	0.027
rs2493272	1	3339373	T	C	PRDM16	intron	-728	0.027
rs11687376	2	235040129	A	G	LOC727890	flanking_3UTR	-4619	0.027
rs7693537	4	135514871	A	G	LOC345016	flanking_3UTR	-45468	0.027
rs12906878	15	96704848	A	G	FLJ39743	flanking_3UTR	-93066	0.027
rs2623191	15	97532299	A	G	TTC23	intron	-479	0.027
rs10791261	11	132252456	A	C	LOC729239	flanking_5UTR	-16784	0.027
rs10264961	7	115737881	T	C	TES	flanking_3UTR	-51808	0.026
rs4354149	6	47442784	A	G	TNFRSF21	flanking_5UTR	-57145	0.026
rs4552208	2	104200840	A	G	LOC728838	flanking_3UTR	-123981	0.026
rs676102	3	140315021	T	C	LOC646641	flanking_5UTR	-31112	0.026
rs293554	20	30549518	A	G	C20orf112	flanking_5UTR	-14669	0.026
rs4778437	15	22015194	T	C	C15orf2	flanking_5UTR	-456914	0.026
rs11688016	2	214666760	T	C	SPAG16	intron	-14405	0.026
rs10789450	1	44841314	T	C	C1orf164	intron	-11110	0.026
rs34518860	6	32702081	T	C	HLA-DQA1	flanking_5UTR	-14984	0.026
rs6075489	20	19156970	T	C	SLC24A3	intron	-15342	0.026
rs4389846	7	153495598	A	C	NULL	intron	-114517	0.026
rs6457617	6	32771829	A	G	HLA-DQB1	flanking_5UTR	-29410	0.026	Rheumatoid arthritis	17554300	Genome-wide association study of 14,000 cases of seven common diseases and 3,000 shared controls.
rs2052942	2	222024819	A	C	EPHA4	intron	-3692	0.026
rs1528402	2	27711021	T	C	XAB1	intron	-196	0.026
rs4254270	15	59486467	T	C	RORA	flanking_5UTR	-177673	0.026
rs4494938	3	175403687	T	C	NLGN1	intron	-72112	0.026
rs3914578	17	13083117	T	C	ELAC2	flanking_5UTR	-221068	0.026
rs10816239	9	9916888	T	G	LOC729802	flanking_3UTR	-686178	0.025
rs732718	12	98755116	T	G	ANKS1B	intron	-11818	0.025
rs7824177	8	110654464	A	G	GOLSYN	flanking_3UTR	-1128	0.025
rs11646074	16	24307419	T	C	CACNG3	flanking_3UTR	-26181	0.025
rs13057604	22	47757167	T	C	FAM19A5	flanking_3UTR	-223417	0.025
rs7626382	3	163386282	A	G	LOC131149	flanking_3UTR	-681858	0.025
rs4742571	9	9225372	T	G	PTPRD	flanking_5UTR	-216637	0.025
rs12915627	15	22157825	T	C	C15orf2	flanking_5UTR	-314283	0.025
rs1530496	5	13984340	T	C	DNAH5	coding	[121/13]	0.025
rs2052943	2	222019310	T	C	EPHA4	intron	-165	0.025
rs610949	3	140297210	A	C	LOC646641	flanking_5UTR	-13301	0.025
rs13143812	4	61095423	A	G	LOC644419	flanking_3UTR	-508524	0.025
rs2080776	2	214664768	A	G	SPAG16	intron	-16397	0.025
rs13153654	5	27968137	A	G	CDH9	flanking_5UTR	-893691	0.025
rs11649670	16	24327847	T	G	CACNG3	flanking_3UTR	-46609	0.025
rs7535213	1	162834350	T	C	PBX1	intron	-35178	0.025
rs11637235	15	46420445	A	G	DUT	intron	-333	0.024	Protein quantitative trait loci	18464913	A genome-wide association study identifies protein quantitative trait loci (pQTLs).
rs244903	5	167846088	A	G	RARS	coding	[6/38]	0.024
rs7169146	15	62088437	A	G	DAPK2	intron	-25431	0.024
rs263955	1	45113290	T	C	EIF2B3	intron	-205	0.024
rs211170	6	97176821	T	G	FHL5	flanking_3UTR	-5588	0.024
rs1956328	14	47376530	T	C	LOC729295	flanking_5UTR	-156308	0.024
rs1528404	2	27700107	A	G	ZNF512	flanking_3UTR	-640	0.024
rs7774436	6	6306815	T	C	RP3-398D13.1	3UTR	[992/778]	0.024
rs4390542	15	50725252	A	G	KIAA1370	intron	-31906	0.024
rs610325	18	39207131	A	C	SYT4	flanking_5UTR	-95789	0.024
rs1360593	9	9430838	T	C	PTPRD	flanking_5UTR	-422103	0.024
rs4459734	2	85400940	A	C	TGOLN2	3UTR	[2283/2429]	0.024
rs4742578	9	9228929	T	G	PTPRD	flanking_5UTR	-220194	0.024
rs623316	3	140256570	A	G	FLJ46210	flanking_5UTR	-10146	0.024
rs4131646	7	153496131	T	C	NULL	intron	-115050	0.024
rs11771172	7	5760746	T	C	RNF216	intron	-1610	0.024
rs4963885	12	25457984	T	G	IFLTD1	flanking_3UTR	-62299	0.024
rs1798628	3	197877877	A	G	LRRC33	flanking_3UTR	-4605	0.024
rs1684441	3	197881277	A	C	LRRC33	flanking_3UTR	-8005	0.024
rs6988341	8	110653602	A	G	GOLSYN	flanking_3UTR	-1990	0.024
rs1041576	9	113225615	T	G	KIAA0368	intron	-266	0.024
rs2610890	10	55415396	T	C	PCDH15	intron	-10019	0.024
rs17308500	7	115738982	A	G	TES	flanking_3UTR	-52909	0.024
rs7698533	4	135152335	T	C	LOC132430	flanking_3UTR	-184603	0.024
rs12200621	6	6347126	T	C	RP3-398D13.1	intron	-32739	0.024
rs6792486	3	59282765	A	C	C3orf67	flanking_5UTR	-272010	0.024
rs1027702	1	159979481	T	C	DUSP12	flanking_5UTR	-6724	0.024
rs16981893	19	53156937	T	C	ELSPBP1	flanking_5UTR	-32806	0.024
rs11949203	5	179878665	T	C	CNOT6	flanking_5UTR	-10216	0.024
rs4924980	17	19145456	A	G	EPN2	intron	-8335	0.024
rs17285647	7	82871577	A	G	SEMA3E	intron	-1125	0.023
rs707590	1	5635418	T	C	NPHP4	flanking_3UTR	-210039	0.023
rs7333936	13	87191878	T	C	SLITRK5	flanking_3UTR	-62006	0.023
rs15413	2	85422890	T	C	RETSAT	3UTR	[157/985]	0.023
rs4778220	15	25894733	T	C	OCA2	intron	-7353	0.023
rs9349401	6	47456151	A	G	TNFRSF21	flanking_5UTR	-70512	0.023
rs9640769	7	115724188	T	C	TES	flanking_3UTR	-38115	0.023
rs3799019	6	69809791	T	C	BAI3	intron	-5007	0.023
rs6467970	7	83340191	A	G	SEMA3A	flanking_3UTR	-88235	0.023
rs7810691	7	83005264	A	G	SEMA3E	intron	-47738	0.023
rs4626957	1	208881050	T	G	HHAT	intron	-17413	0.023
rs3432	17	77227939	A	G	PDE6G	3UTR	[284/569]	0.023
rs9557593	13	87198375	A	G	SLITRK5	flanking_3UTR	-68503	0.023
rs7322039	13	60063429	T	C	TDRD3	flanking_3UTR	-17417	0.023
rs2288627	2	222028671	T	C	EPHA4	intron	-49	0.023
rs674969	3	140282530	T	C	LOC646641	flanking_3UTR	-656	0.023
rs6141319	20	30608468	T	C	RP11-410N8.4	flanking_5UTR	-30474	0.023
rs1532517	15	22083695	A	G	C15orf2	flanking_5UTR	-388413	0.023
rs10917360	1	23411597	T	C	HTR1D	flanking_5UTR	-17788	0.023
rs362732	7	102997304	A	G	RELN	intron	-2563	0.023
rs12409740	1	165404496	A	G	LOC391130	flanking_5UTR	-5798	0.023
rs1925613	10	68432750	A	C	LRRTM3	intron	-74534	0.023
rs10997481	10	68434476	T	C	LRRTM3	intron	-76260	0.023
rs10462717	5	14077415	T	C	DNAH5	flanking_5UTR	-79826	0.023
rs12050807	15	62091805	T	G	DAPK2	intron	-27617	0.023
rs7834060	8	143220109	T	C	TSNARE1	flanking_3UTR	-71239	0.023
rs13181	19	50546759	T	G	ERCC2	coding	[32/60]	0.023	Lung Cancer (DNA repair capacity)	23108145	Genome-wide association study reveals novel genetic determinants of DNA repair capacity in lung cancer.
rs4483956	19	53048964	T	C	CRX	flanking_3UTR	-10571	0.023
rs229053	21	27238139	A	C	ADAMTS5	intron	-402	0.023
rs6682607	1	172462252	T	C	RABGAP1L	intron	-4654	0.023
rs10180461	2	143979503	A	G	ARHGAP15	intron	-13802	0.023
rs10811482	9	21143985	A	G	IFNA21	flanking_3UTR	-11651	0.023
rs780876	12	114672478	A	G	MED13L	flanking_3UTR	-208286	0.023
rs9369682	6	47454279	T	G	TNFRSF21	flanking_5UTR	-68640	0.023
rs8076604	17	24462595	T	C	MYO18A	coding	[27/132]	0.023
rs4597182	13	91637899	A	G	GPC5	intron	-42656	0.023
rs7043239	9	113232166	T	G	KIAA0368	intron	-482	0.023
rs7860748	9	113242323	A	G	KIAA0368	intron	-150	0.023
rs4813935	20	10389438	T	C	C20orf94	intron	-2559	0.023
rs4551185	6	142357870	T	G	NMBR	flanking_3UTR	-83515	0.023
rs17687519	7	13986829	A	G	ETV1	intron	-3199	0.023
rs12857356	13	104783225	A	G	DAOA	flanking_5UTR	-133368	0.023
rs4327548	4	57694025	A	G	IGFBP7	flanking_5UTR	-22729	0.023
rs6731687	2	239171548	A	G	ASB1	flanking_3UTR	-145918	0.022
rs6431612	2	239175763	A	G	ASB1	flanking_3UTR	-150133	0.022
rs12487790	3	57124699	T	C	IL17RD	intron	-814	0.022
rs727531	7	103088691	A	C	RELN	intron	-368	0.022
rs4778211	15	25872900	T	G	OCA2	intron	-999	0.022
rs11083679	19	48205107	T	C	PSG11	intron	-843	0.022
rs627238	18	39187966	T	C	SYT4	flanking_5UTR	-76624	0.022
rs2703952	15	25855576	A	C	OCA2	intron	-10581	0.022
rs1041205	9	126620825	A	G	OLFML2A	flanking_3UTR	-3840	0.022
rs9560979	13	91652714	T	C	GPC5	intron	-57471	0.022
rs1404151	7	83371890	A	G	SEMA3A	flanking_3UTR	-56536	0.022
rs10987476	9	128587508	T	C	ZBTB43	flanking_5UTR	-23385	0.022
rs17709865	10	55438556	A	G	PCDH15	intron	-11402	0.022
rs7613502	3	153811415	A	C	MBNL1	flanking_3UTR	-145157	0.022
rs4877240	9	84630761	T	C	RASEF	flanking_3UTR	-156374	0.022
rs4646221	13	98168014	A	G	SLC15A1	intron	-1478	0.022
rs11130695	3	59280104	T	G	C3orf67	flanking_5UTR	-269349	0.022
rs155434	5	72175929	T	C	TNPO1	intron	-3850	0.022
rs12951787	17	13081024	A	G	ELAC2	flanking_5UTR	-218975	0.022
rs10823229	10	70002586	A	G	CXXC6	coding	[484/1429]	0.022
rs861085	5	102946704	T	C	NUDT12	flanking_5UTR	-20315	0.022
rs11959989	5	14039248	A	G	DNAH5	flanking_5UTR	-41659	0.022
rs6663682	1	165406793	T	G	LOC391130	flanking_5UTR	-8095	0.022
rs10807113	6	32830164	A	C	HLA-DQB2	flanking_3UTR	-1689	0.022
rs7756516	6	32831895	A	G	HLA-DQB2	3UTR	[42/312]	0.022
rs1023449	6	32835883	T	G	HLA-DQB2	intron	-997	0.022
rs1472081	17	24420016	A	G	MYO18A	flanking_3UTR	-4638	0.022
rs3823070	6	69850758	A	C	BAI3	intron	-8107	0.022
rs4301808	11	84275276	T	G	DLG2	intron	-36493	0.022
rs12915981	15	50688725	A	G	KIAA1370	coding	[668/1147]	0.022
rs2190385	7	14278565	A	G	DGKB	intron	-66100	0.022
rs3934930	8	143226261	A	G	TSNARE1	flanking_3UTR	-65087	0.022
rs12603862	17	24450537	A	G	MYO18A	intron	-241	0.022
rs35837041	2	132197350	A	G	LOC389049	UTR	[69/1059]	0.022
rs7175467	15	59180808	T	C	RORA	intron	-127736	0.022
rs13251017	8	14912887	T	C	SGCZ	intron	-226578	0.022
rs13251961	8	14913179	A	G	SGCZ	intron	-226286	0.022
rs12550462	8	14913506	A	G	SGCZ	intron	-225959	0.022
rs4732523	7	83321915	A	G	SEMA3A	flanking_3UTR	-106511	0.022
rs1006817	7	103043221	A	C	RELN	intron	-3735	0.022
rs2517646	6	30230554	T	C	TRIM10	intron	-312	0.022
rs154972	6	33008629	A	G	HLA-DMB	flanking_3UTR	-1764	0.022
rs181997	6	33008696	A	G	HLA-DMB	flanking_3UTR	-1697	0.022
rs12206048	6	97191674	A	G	FHL5	flanking_3UTR	-20441	0.022
rs2170239	8	14919295	T	C	SGCZ	intron	-220170	0.022
rs6140010	20	6421123	T	C	LOC728383	flanking_5UTR	-216444	0.022
rs6839942	4	180555751	A	G	LOC391719	flanking_3UTR	-1110318	0.022
rs17754589	8	11663217	T	C	NEIL2	flanking_5UTR	-1449	0.022
rs9692117	7	115715195	A	C	TES	flanking_3UTR	-29122	0.022
rs10918653	1	165410520	T	C	LOC391130	flanking_5UTR	-11822	0.022
rs548853	3	198152756	T	C	NCBP2	intron	-938	0.022
rs2339478	2	29849305	T	C	ALK	intron	-55238	0.022
rs12918898	16	72024380	T	C	C16orf47	flanking_5UTR	-288533	0.022

## Sheet: A-C
rsID	Chr	Position	Allele A	Allele B	Gene	Region	Position relative to gene	Fst values	Disease/Trait	PUBMEDID	GWAS Study
rs12701014	7	3654452	T	C	SDK1	intron	-6189	0.066
rs1435190	18	39298219	T	C	SYT4	flanking_5UTR	-186877	0.054
rs659230	18	39206628	T	G	SYT4	flanking_5UTR	-95286	0.054
rs28397286	6	31275552	A	G	HCG27	intron	-1914	0.051
rs13223065	7	3606138	T	C	SDK1	intron	-19100	0.05
rs4778437	15	22015194	T	C	C15orf2	flanking_5UTR	-456914	0.05
rs12477830	2	108305167	T	C	LOC151234	5UTR	[41/103]	0.047
rs2116263	6	33133471	A	G	HLA-DPA1	flanking_3UTR	-7301	0.047
rs12741782	1	169699733	T	C	BAT2D1	flanking_5UTR	-21557	0.047
rs9356806	6	22312177	A	G	LOC729177	flanking_5UTR	-55697	0.046
rs10807081	6	31277743	T	G	HCG27	intron	-385	0.046
rs1426654	15	46213776	A	G	SLC24A5	coding	[29/54]	0.046
rs2517646	6	30230554	T	C	TRIM10	intron	-312	0.046
rs12476238	2	108306768	A	G	LOC151234	intron	-1419	0.046
rs12915627	15	22157825	T	C	C15orf2	flanking_5UTR	-314283	0.045
rs11130248	3	50327204	A	G	HYAL1	flanking_5UTR	-2388	0.045	Keloid	20711176	A genome-wide association study identifies four susceptibility loci for keloid in the Japanese population.
rs619152	13	109737498	T	C	COL4A1	intron	-19794	0.045
rs1556152	9	78857315	T	C	LOC645225	flanking_3UTR	-11906	0.045
rs11637235	15	46420445	A	G	DUT	intron	-333	0.044	Protein quantitative trait loci	18464913	A genome-wide association study identifies protein quantitative trait loci (pQTLs).
rs2291652	3	196963462	T	C	MUC4	coding	[31/192]	0.044
rs4122189	6	31275906	A	G	HCG27	intron	-2222	0.044
rs4910725	11	5154053	A	G	OR51V1	flanking_3UTR	-23488	0.044
rs831208	13	59040141	T	C	DIAPH3	flanking_3UTR	-206157	0.044
rs7481262	11	5148671	T	C	OR52A1	flanking_5UTR	-18496	0.044
rs2236950	3	50395558	T	G	CACNA2D2	intron	-1073	0.044
rs2378113	2	108432856	T	C	GCC2	intron	-279	0.043
rs4676040	2	108682187	A	G	LOC644911	flanking_3UTR	-12960	0.043
rs4337777	4	135357410	T	C	LOC132430	flanking_5UTR	-15057	0.043
rs2844787	6	30248892	T	G	TRIM15	flanking_3UTR	-440	0.043
rs4149433	2	108363694	T	C	SULT1C4	intron	-956	0.043
rs9398792	6	126313196	A	G	HINT3	flanking_5UTR	-6433	0.042
rs1554012	2	177352828	A	G	LOC375295	flanking_5UTR	-32486	0.042
rs10839220	11	1671312	A	C	KRTAP5-6	flanking_5UTR	-3689	0.042
rs2236988	3	50479900	T	C	CACNA2D2	intron	-8653	0.042
rs10205370	2	108559939	T	C	LIMS1	flanking_5UTR	-11260	0.042
rs1821867	2	108577286	T	C	LIMS1	intron	-5973	0.042
rs11602279	11	5166168	A	G	OR51V1	flanking_3UTR	-11373	0.042
rs3103952	3	197007087	T	C	MUC4	intron	-4324	0.042
rs4744818	9	78848265	A	G	LOC645225	flanking_3UTR	-2856	0.042
rs12469016	2	108622967	A	G	LIMS1	intron	-19526	0.042
rs2424641	20	24665867	T	G	C20orf39	flanking_3UTR	-70700	0.041
rs1469964	2	108537163	A	G	FLJ38668	flanking_5UTR	-20056	0.041
rs844518	3	196978488	A	G	MUC4	intron	-497	0.041
rs10734485	11	5145420	T	C	OR52A1	flanking_5UTR	-15245	0.041
rs293554	20	30549518	A	G	C20orf112	flanking_5UTR	-14669	0.041
rs4665327	2	26546455	T	G	OTOF	intron	-510	0.041
rs2236944	3	50267197	A	C	GNAI2	intron	-1431	0.041
rs12662501	6	31298829	T	C	HCG27	flanking_3UTR	-19106	0.041
rs442392	5	13656883	T	G	LOC391738	flanking_3UTR	-34141	0.041
rs10798416	1	169695897	A	G	BAT2D1	flanking_5UTR	-25393	0.04
rs524633	18	328132	A	C	COLEC12	intron	-2902	0.04
rs2424664	20	24682936	T	C	C20orf39	flanking_3UTR	-87769	0.04
rs6490840	13	18462715	A	C	LOC348021	flanking_5UTR	-17684	0.04
rs6556114	5	173504283	A	G	HMP19	flanking_3UTR	-35495	0.04
rs2334499	11	1653425	A	G	FAM99A	flanking_3UTR	-7764	0.04
rs9510969	13	18467428	A	G	LOC348021	flanking_5UTR	-12971	0.04
rs1545985	3	45980482	A	G	FYCO1	intron	-350	0.04
rs6578557	11	5147533	T	C	OR52A1	flanking_5UTR	-17358	0.04
rs2884005	2	171976307	A	G	C2orf37	flanking_5UTR	-2867	0.04
rs4778389	15	21878070	A	G	NDN	flanking_5UTR	-394527	0.04
rs12901218	15	62057241	T	C	DAPK2	intron	-5544	0.04
rs193847	7	105368125	T	G	FLJ23834	flanking_5UTR	-22796	0.04
rs7927539	11	5155784	A	G	OR51V1	flanking_3UTR	-21757	0.04
rs7924390	11	5155798	T	G	OR51V1	flanking_3UTR	-21743	0.04
rs9358803	6	24927426	A	G	C6orf32	flanking_3UTR	-20140	0.04
rs2993410	1	46984596	A	G	KIAA0494	flanking_5UTR	-27273	0.039
rs121724	7	29207970	A	C	CHN2	intron	-6839	0.039
rs7868673	9	9820675	A	G	LOC729802	flanking_3UTR	-782391	0.039
rs9557106	13	98422565	T	C	DOCK9	intron	-16759	0.039
rs9358552	6	22584187	A	G	HDGFL1	flanking_5UTR	-93587	0.039
rs1397829	4	23197094	A	G	PPARGC1A	flanking_3UTR	-205649	0.039
rs2301220	6	33146744	A	G	HLA-DPA1	intron	-1103	0.039
rs4358452	4	135471248	T	C	LOC345016	flanking_3UTR	-1845	0.039
rs1017927	4	135481952	T	C	LOC345016	flanking_3UTR	-12549	0.039
rs9916038	17	60825222	T	G	AXIN2	flanking_3UTR	-129921	0.039
rs583058	1	210677378	A	G	NENF	intron	-4293	0.039
rs2631221	10	68013385	A	G	CTNNA3	intron	-38071	0.039
rs4784640	16	50331811	A	C	hCG_2045437	flanking_3UTR	-285954	0.039
rs12609898	19	62261724	A	G	USP29	flanking_5UTR	-63781	0.039
rs3091433	20	44846495	A	C	SLC2A10	flanking_3UTR	-48102	0.039
rs736929	14	96413076	A	G	VRK1	intron	-866	0.039
rs7652331	3	45937756	A	G	FYCO1	3UTR	[3356/504]	0.039
rs12050807	15	62091805	T	G	DAPK2	intron	-27617	0.039
rs2145639	14	96320329	A	G	VRK1	flanking_5UTR	-13108	0.039
rs7948698	11	5156922	A	G	OR51V1	flanking_3UTR	-20619	0.039
rs2177336	3	197001273	T	C	MUC4	coding	[1389/1490]	0.039
rs6049931	20	24666729	A	G	C20orf39	flanking_3UTR	-71562	0.039
rs6578562	11	5156251	A	G	OR51V1	flanking_3UTR	-21290	0.038
rs2224442	14	96342135	A	C	VRK1	intron	-8598	0.038
rs1862205	5	108684534	A	G	PJA2	flanking_3UTR	-13785	0.038
rs9423457	10	2538174	T	C	LOC727878	flanking_5UTR	-3826	0.038
rs1141034	6	25888311	A	G	SLC17A4	3UTR	[915/108]	0.038
rs10789450	1	44841314	T	C	C1orf164	intron	-11110	0.038
rs6549292	3	70315316	T	C	LOC654340	flanking_5UTR	-56860	0.038
rs1334954	13	18482477	T	G	LOC348021	intron	-894	0.038
rs17177644	8	12812392	T	G	NULL	flanking_5UTR	-41125	0.038
rs2230532	14	96391442	T	C	VRK1	coding	[128/4]	0.038
rs7705657	5	108672645	T	G	PJA2	flanking_3UTR	-25674	0.038
rs7178104	15	61892636	T	C	HERC1	intron	-20443	0.038
rs12629572	3	50299676	A	C	C3orf45	3UTR	[38/873]	0.038
rs2251330	3	196946221	A	G	MUC20	flanking_3UTR	-127	0.038
rs2947381	8	12813889	T	C	NULL	flanking_5UTR	-39628	0.038
rs7675604	4	135484058	A	G	LOC345016	flanking_3UTR	-14655	0.038
rs783036	1	66603958	A	G	PDE4B	coding	[20/79]	0.038
rs3759351	12	6882297	A	G	LRRC23	flanking_5UTR	-1916	0.038
rs9329298	10	2547531	A	G	LOC727878	flanking_5UTR	-13183	0.038
rs1372680	4	100523568	A	C	ADH7	flanking_3UTR	-28873	0.038
rs12590723	14	96427455	A	G	VRK1	flanking_3UTR	-9751	0.038
rs9358796	6	24866803	A	C	GMNN	flanking_5UTR	-16340	0.038
rs395538	6	159868861	A	G	LOC642738	flanking_5UTR	-1269	0.038
rs438657	6	159868949	A	G	LOC642738	flanking_5UTR	-1357	0.038
rs10742552	11	5145403	A	C	OR52A1	flanking_5UTR	-15228	0.038
rs1106502	3	197001653	T	C	MUC4	coding	[1769/1110]	0.038
rs1104760	3	197001716	A	G	MUC4	coding	[1832/1047]	0.038
rs10169264	2	108422340	T	C	GCC2	flanking_5UTR	-9728	0.038
rs6754683	2	108522707	A	G	FLJ38668	flanking_5UTR	-5600	0.038
rs9388462	6	126318495	T	G	HINT3	flanking_5UTR	-1134	0.037
rs694372	18	341114	A	C	COLEC12	intron	-2951	0.037
rs2493272	1	3339373	T	C	PRDM16	intron	-728	0.037
rs2473729	6	23147814	A	G	LOC389370	flanking_5UTR	-321682	0.037
rs400277	5	108703636	T	C	PJA2	intron	-2680	0.037
rs9898533	17	60821500	T	C	AXIN2	flanking_3UTR	-133643	0.037
rs3756464	5	34005451	T	C	SLC45A2	intron	-5573	0.037
rs4770584	13	18484754	T	C	LOC348021	3UTR	[826/23]	0.037
rs4244706	3	54234841	T	C	CACNA2D3	intron	-94668	0.037
rs2024636	11	32893982	T	C	QSER1	flanking_5UTR	-10112	0.037
rs2424681	20	24696829	T	C	C20orf39	flanking_3UTR	-101662	0.037
rs2540142	12	4044936	T	G	LOC399988	flanking_5UTR	-31942	0.037
rs6904320	6	32420060	T	C	C6orf10	intron	-4667	0.037
rs3117133	6	32421631	C	G	C6orf10	intron	-3864	0.037
rs4976606	5	167783746	A	G	WWC1	intron	-95	0.037
rs1372679	4	100523553	T	C	ADH7	flanking_3UTR	-28888	0.037
rs2594909	15	25824657	T	C	OCA2	intron	-20211	0.037
rs2703936	15	25831670	A	C	OCA2	intron	-13198	0.037
rs1437787	2	216026482	T	C	FN1	flanking_5UTR	-17446	0.037
rs2243288	5	132045843	T	C	IL4	intron	-234	0.037
rs1431399	6	33149012	T	C	HLA-DPA1	intron	-214	0.037
rs16961946	15	47041185	T	C	SHC4	intron	-735	0.037
rs956393	7	3657805	A	G	SDK1	intron	-9542	0.037
rs2326319	3	85679825	A	G	CADM2	flanking_5UTR	-178497	0.037
rs10509119	10	61482646	T	C	ANK3	intron	-2776	0.037
rs1317816	6	25873369	T	C	SLC17A4	intron	-3109	0.037
rs3778272	6	25875640	T	C	SLC17A4	intron	-1552	0.037
rs1892248	6	25876893	A	G	SLC17A4	intron	-299	0.037
rs4712970	6	25878686	T	C	SLC17A4	intron	-8	0.037
rs1317510	6	25886903	A	G	SLC17A4	intron	-358	0.037
rs627238	18	39187966	T	C	SYT4	flanking_5UTR	-76624	0.036
rs7753085	6	23175652	A	G	LOC389370	flanking_5UTR	-349520	0.036
rs4616894	5	12075698	A	C	CTNND2	flanking_5UTR	-118588	0.036
rs2282751	3	50266789	T	C	GNAI2	intron	-1169	0.036
rs10903794	10	2561838	T	C	LOC727878	flanking_5UTR	-27490	0.036
rs246103	5	108727773	A	G	PJA2	intron	-1151	0.036
rs4778211	15	25872900	T	G	OCA2	intron	-999	0.036
rs2243290	5	132046068	T	G	IL4	intron	-9	0.036
rs7168440	15	61747848	T	C	HERC1	intron	-942	0.036
rs4411464	15	61782476	A	G	HERC1	intron	-3556	0.036
rs7178111	15	61862564	T	C	HERC1	intron	-7663	0.036
rs6542787	2	108922797	A	G	EDAR	intron	-8877	0.036
rs561437	13	109734228	A	G	COL4A1	intron	-23064	0.036
rs10807113	6	32830164	A	C	HLA-DQB2	flanking_3UTR	-1689	0.036
rs7756516	6	32831895	A	G	HLA-DQB2	3UTR	[42/312]	0.036
rs1023449	6	32835883	T	G	HLA-DQB2	intron	-997	0.036
rs137139	22	41354354	T	C	CYB5R3	intron	-123	0.036
rs9375421	6	126398082	T	C	TRMT11	intron	-3462	0.036
rs10009368	4	135341051	A	G	LOC132430	coding	[539/573]	0.036
rs2416223	5	109251998	A	C	MAN2A1	flanking_3UTR	-20670	0.036
rs377763	6	32307122	A	C	NOTCH4	flanking_5UTR	-7300	0.036
rs7169146	15	62088437	A	G	DAPK2	intron	-25431	0.036
rs4905564	14	96434843	T	C	VRK1	flanking_3UTR	-17139	0.036
rs10977997	9	9795496	T	C	PTPRD	flanking_5UTR	-786761	0.036
rs785426	15	27966163	A	G	LOC727808	flanking_3UTR	-62569	0.036
rs4804	1	210685962	T	C	NENF	coding	[167/9]	0.036
rs582037	11	125723080	A	G	DCPS	flanking_3UTR	-2226	0.036
rs4699748	4	100540466	A	G	ADH7	flanking_3UTR	-11975	0.036
rs2688513	3	196990443	T	C	MUC4	coding	[3/80]	0.036
rs13242531	7	3654640	T	C	SDK1	intron	-6377	0.036
rs7693537	4	135514871	A	G	LOC345016	flanking_3UTR	-45468	0.036
rs2259419	3	196990196	A	G	MUC4	intron	-91	0.035
rs6973717	7	53142182	T	G	DKFZp564N2472	flanking_3UTR	-70070	0.035
rs7578007	2	29068509	A	C	LOC165186	flanking_5UTR	-41292	0.035
rs17788807	15	62070001	T	C	DAPK2	intron	-6995	0.035
rs678701	4	90345074	A	G	GPRIN3	flanking_3UTR	-42213	0.035
rs610325	18	39207131	A	C	SYT4	flanking_5UTR	-95789	0.035
rs2498259	6	23143312	T	C	LOC389370	flanking_5UTR	-317180	0.035
rs154972	6	33008629	A	G	HLA-DMB	flanking_3UTR	-1764	0.035
rs181997	6	33008696	A	G	HLA-DMB	flanking_3UTR	-1697	0.035
rs6902804	6	22814193	T	C	LOC389370	intron	-11736	0.035
rs10836711	11	4796119	T	C	OR51F2	flanking_5UTR	-3073	0.035
rs4389846	7	153495598	A	C	NULL	intron	-114517	0.035
rs720465	6	31233756	T	G	CCHCR1	flanking_5UTR	-237	0.035
rs6494458	15	62058148	T	G	DAPK2	intron	-4637	0.035
rs10485438	20	44142045	A	G	NCOA5	intron	-546	0.035
rs1250223	2	216030633	T	C	FN1	flanking_5UTR	-21597	0.035
rs6083603	20	24675733	A	G	C20orf39	flanking_3UTR	-80566	0.035
rs6083605	20	24676904	T	C	C20orf39	flanking_3UTR	-81737	0.035
rs2388282	10	2596931	A	G	LOC727878	flanking_5UTR	-62583	0.035
rs2259331	3	196986892	T	C	MUC4	intron	-82	0.035
rs4354149	6	47442784	A	G	TNFRSF21	flanking_5UTR	-57145	0.035
rs1467913	3	50500021	A	C	CACNA2D2	intron	-11387	0.035
rs4776701	15	62065261	T	G	DAPK2	intron	-2255	0.035

## Sheet: A-D
rsID	Chr	Position	Allele A	Allele B	Gene	Region	Position relative to gene	Fst values	Disease/Trait	PUBMEDID	GWAS Study
rs12476238	2	108306768	A	G	LOC151234	intron	-1419	0.065
rs12477830	2	108305167	T	C	LOC151234	5UTR	[41/103]	0.063
rs4149433	2	108363694	T	C	SULT1C4	intron	-956	0.06
rs1165206	6	25975545	A	G	SLC17A3	intron	-959	0.055
rs9393670	6	25897040	A	G	SLC17A1	intron	-5615	0.054
rs1879494	2	108304947	T	G	LOC151234	flanking_5UTR	-179	0.052
rs10791388	11	134120636	T	C	LOC729305	flanking_3UTR	-9000	0.051
rs1944880	11	134121417	A	G	LOC729305	flanking_3UTR	-9781	0.051
rs7598552	2	108306502	A	G	LOC151234	intron	-1153	0.051
rs390789	21	41651707	A	C	FAM3B	flanking_3UTR	-183	0.05
rs3093998	6	31593153	T	G	MICB	flanking_3UTR	-6273	0.05
rs12577389	11	107178633	T	C	SLC35F2	intron	-304	0.05
rs2272955	20	43617912	T	C	WFDC8	coding	[158/9]	0.05
rs1860931	12	7838284	A	G	NANOG	intron	-36	0.05
rs4675287	2	203262081	T	C	ALS2CR13	intron	-6768	0.049
rs4846812	1	215316073	T	G	ESRRG	intron	-13399	0.049
rs2070642	6	25939191	T	C	SLC17A1	flanking_5UTR	-415	0.048
rs4753817	11	107169879	T	C	SLC35F2	intron	-1143	0.048
rs12826131	12	7833739	A	G	NANOG	intron	-111	0.048
rs1165153	6	25925768	T	C	SLC17A1	intron	-1507	0.048
rs892020	19	13128185	T	G	IER2	flanking_3UTR	-1463	0.047
rs12658068	5	128723668	T	C	ADAMTS19	flanking_5UTR	-100334	0.047
rs1165196	6	25921129	A	G	SLC17A1	coding	[91/70]	0.047	Urate levels	20884846	Multiple genetic loci influence serum urate levels and their relationship with gout and cardiovascular disease risk factors.
rs1185567	6	25926567	A	G	SLC17A1	intron	-708	0.047
rs765285	6	25936221	C	G	SLC17A1	intron	-1381	0.047
rs1573221	10	18528471	A	G	CACNB2	intron	-48561	0.047
rs1408271	6	25967600	A	T	SLC17A3	intron	-2231	0.046
rs2837384	21	40339875	T	C	DSCAM	intron	-1803	0.046
rs2837405	21	40351580	T	C	DSCAM	intron	-1943	0.046
rs17686361	4	144427136	A	G	GAB1	flanking_5UTR	-50364	0.046
rs2145639	14	96320329	A	G	VRK1	flanking_5UTR	-13108	0.046
rs10040697	5	95199643	T	C	LOC727938	flanking_5UTR	-3137	0.046
rs1165215	6	25906911	T	C	SLC17A1	intron	-79	0.046
rs1165177	6	25937638	A	T	SLC17A1	intron	-1093	0.046
rs1165176	6	25938277	A	G	SLC17A1	intron	-454	0.046
rs9393672	6	25950584	A	C	SLC17A3	flanking_3UTR	-2723	0.046
rs4712976	6	25950182	A	G	SLC17A3	flanking_3UTR	-3125	0.046
rs10054817	5	128725028	T	C	ADAMTS19	flanking_5UTR	-98974	0.046
rs10135283	14	96322382	T	C	VRK1	flanking_5UTR	-11055	0.045
rs1735093	7	152628820	T	G	FLJ42291	flanking_3UTR	-110432	0.045
rs12201071	6	25886034	A	G	SLC17A4	intron	-99	0.045
rs3759351	12	6882297	A	G	LRRC23	flanking_5UTR	-1916	0.044
rs10145396	14	96325432	A	C	VRK1	flanking_5UTR	-8005	0.044
rs11754288	6	25884928	A	G	SLC17A4	coding	[126/6]	0.044	Cardiovascular disease risk factors	21943158	Genetic variants in LPL, OASL and TOMM40/APOE-C1-C2-C4 genes are associated with multiple cardiovascular-related traits.
rs10135234	14	96322109	A	G	VRK1	flanking_5UTR	-11328	0.044
rs1165160	6	25972435	T	C	SLC17A3	intron	-1784	0.044
rs1165207	6	25973245	T	C	SLC17A3	intron	-2594	0.044
rs2955849	11	57005697	T	C	LOC728289	flanking_5UTR	-1060	0.044
rs13490	1	228483383	T	C	GALNT2	3UTR	[1555/1186]	0.043
rs2224442	14	96342135	A	C	VRK1	intron	-8598	0.043
rs8073257	17	53328983	T	C	LOC729465	intron	-6363	0.043
rs12878184	14	96345009	A	G	VRK1	intron	-11472	0.043
rs2230532	14	96391442	T	C	VRK1	coding	[128/4]	0.043
rs3213433	12	6899312	T	G	ENO2	intron	-124	0.043
rs2096386	6	25895796	T	C	SLC17A1	intron	-4371	0.043
rs17841559	16	34654243	A	G	LOC727964	flanking_3UTR	-8304	0.043
rs8112067	19	13110244	T	C	BTBD14B	3UTR	[23/2715]	0.042
rs1165205	6	25978521	T	A	SLC17A3	intron	-1894	0.042	Urate levels	18834626	Association of three genetic loci with uric acid concentration and risk of gout: a genome-wide association study.
rs12643013	4	144426398	A	G	GAB1	flanking_5UTR	-51102	0.042
rs3092198	20	44867730	T	G	SLC2A10	flanking_3UTR	-69337	0.042
rs457920	21	41716628	T	C	MX1	flanking_5UTR	-3396	0.042
rs4260065	16	34935609	A	G	LOC729564	flanking_5UTR	-40463	0.042
rs12443981	16	30367556	A	C	XTP3TPA	flanking_5UTR	-18682	0.042
rs12981904	19	13109856	T	C	BTBD14B	intron	-105	0.042
rs3805322	4	100276021	A	G	ADH4	intron	-619	0.042	Esophageal cancer (alcohol interaction)	22960999	Genome-wide association analyses of esophageal squamous cell carcinoma in Chinese identify multiple susceptibility loci and gene-environment interactions.
rs8050463	16	30461660	T	C	ZNF747	flanking_5UTR	-7965	0.041
rs2993410	1	46984596	A	G	KIAA0494	flanking_5UTR	-27273	0.041
rs1570008	20	17306778	T	C	PCSK2	intron	-8856	0.041
rs6034810	20	17308298	A	G	PCSK2	intron	-10376	0.041
rs12209856	6	25901652	T	C	SLC17A1	intron	-5338	0.041
rs6537153	4	144450352	T	G	GAB1	flanking_5UTR	-27148	0.041
rs442392	5	13656883	T	G	LOC391738	flanking_3UTR	-34141	0.04
rs1250226	2	216038042	T	C	FN1	flanking_5UTR	-29006	0.04
rs3799344	6	25894972	T	C	SLC17A1	intron	-3547	0.04
rs12590723	14	96427455	A	G	VRK1	flanking_3UTR	-9751	0.04
rs1165156	6	25900957	T	C	SLC17A1	intron	-6033	0.04
rs10014445	4	14790983	A	G	CPEB2	flanking_3UTR	-110111	0.04
rs12469016	2	108622967	A	G	LIMS1	intron	-19526	0.04
rs7563319	2	203249995	T	C	ALS2CR13	intron	-18854	0.04
rs12047825	1	206672430	T	G	PLXNA2	flanking_5UTR	-188691	0.04
rs1250224	2	216033519	A	C	FN1	flanking_5UTR	-24483	0.04
rs17675813	16	64367041	A	G	LOC283867	flanking_5UTR	-199337	0.039
rs4916595	3	198172424	A	C	PIGZ	intron	-7531	0.039
rs7761785	6	55109996	A	G	HCRTR2	flanking_5UTR	-37032	0.039
rs12453022	17	3786804	A	G	ATP2A3	intron	-292	0.039
rs1250223	2	216030633	T	C	FN1	flanking_5UTR	-21597	0.039
rs6137635	20	22325724	T	C	C20orf56	flanking_5UTR	-151033	0.039
rs6132511	20	22327060	T	C	C20orf56	flanking_5UTR	-149697	0.039
rs10054692	5	67131146	T	C	LOC643631	flanking_5UTR	-56170	0.039
rs1437787	2	216026482	T	C	FN1	flanking_5UTR	-17446	0.039
rs751877	14	23866653	T	G	ADCY4	intron	-1265	0.039
rs6984189	8	74456709	A	G	RDH10	flanking_3UTR	-57362	0.039
rs13728	1	228482841	T	C	GALNT2	3UTR	[1013/1728]	0.038
rs12669170	7	52043951	A	C	LOC642663	flanking_3UTR	-625994	0.038
rs12472075	2	177399376	T	C	LOC375295	flanking_5UTR	-79034	0.038
rs4148213	2	43925356	C	G	ABCG8	intron	-105	0.038
rs7796855	7	49627992	A	C	LOC727813	flanking_5UTR	-38214	0.038
rs12530588	7	82986148	A	G	SEMA3E	intron	-28622	0.038
rs10802219	1	243765708	A	G	KIF26B	intron	-4984	0.038
rs1441443	3	74005900	A	C	PDZRN3	flanking_5UTR	-249138	0.038
rs10941232	5	35090396	T	C	AGXT2	flanking_5UTR	-6640	0.038
rs12757160	1	85532256	T	C	LOC646626	flanking_3UTR	-15897	0.038
rs6457737	6	9493390	A	G	LOC389365	flanking_3UTR	-457237	0.038
rs2369898	14	96308969	T	C	VRK1	flanking_5UTR	-24468	0.038
rs4238961	16	30287987	A	G	TBC1D10B	intron	-63	0.038
rs6137636	20	22326009	A	G	C20orf56	flanking_5UTR	-150748	0.038
rs11574941	16	30400501	A	G	ITGAL	intron	-95	0.038
rs6732028	2	115303409	A	G	LOC391429	flanking_3UTR	-164275	0.038	Obesity-related traits	23251661	Novel genetic loci identified for the pathophysiology of childhood obesity in the Hispanic population.
rs6472769	8	74460683	A	C	RDH10	flanking_3UTR	-61336	0.038
rs11657553	17	45315805	T	C	TAC4	flanking_5UTR	-35427	0.038
rs4791806	17	7669909	A	G	DNAH2	intron	-1139	0.038
rs1015199	20	58968585	T	C	LOC729382	flanking_3UTR	-257839	0.038
rs4148211	2	43925247	A	G	ABCG8	coding	[97/4]	0.038
rs6044776	20	17315594	T	C	PCSK2	intron	-17672	0.037
rs1426194	8	21386024	T	C	LOC646608	flanking_3UTR	-170572	0.037
rs6509438	19	54771263	T	C	NOSIP	intron	-565	0.037
rs2484639	1	241528990	T	C	SDCCAG8	intron	-5648	0.037
rs1339208	1	215296850	T	C	ESRRG	intron	-32622	0.037
rs2459210	10	126134169	T	G	LHPP	flanking_5UTR	-6233	0.037	Hemostatic factors and hematological phenotypes	22443383	Genome wide association study for plasma levels of natural anticoagulant inhibitors and protein C anticoagulant pathway: the MARTHA project.
rs4148210	2	43925143	T	C	ABCG8	intron	-7	0.037
rs10174379	2	138613219	A	G	HNMT	flanking_3UTR	-122815	0.037
rs2546194	5	95219068	T	C	C5orf27	intron	-627	0.037
rs11223975	11	134116335	T	C	LOC729305	flanking_3UTR	-4699	0.037
rs10227315	7	49370328	T	C	LOC727813	flanking_5UTR	-295878	0.037
rs17505926	7	82996280	T	C	SEMA3E	intron	-38754	0.037
rs4712970	6	25878686	T	C	SLC17A4	intron	-8	0.037
rs1317510	6	25886903	A	G	SLC17A4	intron	-358	0.037
rs599651	11	100231930	A	C	FLJ32810	intron	-3565	0.037
rs10493763	1	85499806	A	G	C1orf52	flanking_5UTR	-1893	0.037
rs938278	2	177256759	A	G	LOC375295	intron	-1276	0.037
rs6754683	2	108522707	A	G	FLJ38668	flanking_5UTR	-5600	0.037
rs11752338	6	47475109	A	C	CD2AP	flanking_5UTR	-78791	0.037
rs2490395	1	241525545	A	G	SDCCAG8	intron	-2401	0.037
rs1654558	19	56187521	T	C	KLK8	flanking_3UTR	-3555	0.037
rs2022065	6	30229439	A	G	TRIM10	3UTR	[198/285]	0.036
rs12591947	15	62223508	A	C	SNX1	flanking_3UTR	-22	0.036
rs4148209	2	43925129	A	C	ABCG8	intron	-21	0.036
rs6942287	6	62243207	A	G	LOC727798	flanking_3UTR	-154892	0.036
rs2378113	2	108432856	T	C	GCC2	intron	-279	0.036
rs2162728	5	173683171	A	G	HMP19	flanking_3UTR	-214383	0.036
rs736929	14	96413076	A	G	VRK1	intron	-866	0.036
rs696945	1	206676526	A	C	PLXNA2	flanking_5UTR	-192787	0.036
rs7532636	1	215294739	T	C	ESRRG	intron	-34733	0.036
rs969816	2	211352006	A	G	CPS1	flanking_3UTR	-99930	0.036
rs10519649	4	143674003	T	C	INPP4B	flanking_5UTR	-102021	0.036
rs16950922	16	78247671	T	C	MAF	flanking_5UTR	-55559	0.036
rs10488786	11	100245404	T	C	FLJ32810	intron	-9838	0.036
rs893929	4	144406830	A	G	USP38	flanking_3UTR	-44740	0.036
rs2056452	7	52023565	A	G	LOC642663	flanking_3UTR	-605608	0.036
rs2108196	2	101834248	A	G	MAP4K4	intron	-4623	0.036
rs1139583	2	101838891	A	G	MAP4K4	coding	[20/141]	0.036
rs1856775	1	102648980	A	G	OLFM3	flanking_5UTR	-413844	0.036
rs1417226	1	102655859	T	C	OLFM3	flanking_5UTR	-420723	0.036
rs2074991	17	3785375	T	C	ATP2A3	intron	-55	0.036
rs1499575	1	206651975	T	C	PLXNA2	flanking_5UTR	-168236	0.036
rs1030012	7	77976913	A	C	MAGI2	intron	-7873	0.036
rs16987743	19	62291473	T	C	USP29	flanking_5UTR	-31848	0.036
rs10485944	7	49385496	T	G	LOC727813	flanking_5UTR	-280710	0.036
rs1559497	2	30971562	A	G	GALNT14	flanking_3UTR	-15275	0.036
rs1591548	6	62094417	A	C	LOC727798	flanking_3UTR	-303682	0.036
rs6451392	5	38625773	A	G	LIFR	intron	-5347	0.036
rs2885563	7	78001237	A	G	MAGI2	intron	-12339	0.036
rs6883095	5	79926803	A	G	ANKRD34B	flanking_5UTR	-24949	0.036
rs9552536	13	21364085	T	C	FGF9	flanking_3UTR	-189898	0.035
rs7567579	2	122294762	A	G	hCG_2045614	flanking_3UTR	-24360	0.035
rs1476122	4	143688686	A	G	INPP4B	flanking_5UTR	-116704	0.035
rs13420380	2	29099437	T	C	LOC165186	flanking_5UTR	-10364	0.035
rs6661776	1	11734714	T	C	AGTRAP	flanking_3UTR	-1299	0.035
rs4668254	2	170948909	A	G	MYO3B	intron	-339	0.035
rs561267	11	100210990	T	C	FLJ32810	intron	-24505	0.035
rs2542615	10	131018942	T	C	MGMT	flanking_5UTR	-136514	0.035
rs6709463	2	203253443	A	G	ALS2CR13	intron	-15406	0.035
rs1317816	6	25873369	T	C	SLC17A4	intron	-3109	0.035
rs3778272	6	25875640	T	C	SLC17A4	intron	-1552	0.035
rs1892248	6	25876893	A	G	SLC17A4	intron	-299	0.035
rs772788	2	234913301	T	C	LOC727890	flanking_5UTR	-4006	0.035
rs12620956	2	26562438	T	C	OTOF	intron	-1433	0.035
rs1671518	12	16280892	A	G	LOC729025	intron	-2990	0.035
rs12599426	16	34945632	T	C	LOC729564	flanking_5UTR	-50486	0.035
rs2837421	21	40364563	T	G	DSCAM	intron	-4271	0.035
rs9360231	6	62241860	T	C	LOC727798	flanking_3UTR	-156239	0.035
rs12538704	7	114576431	A	G	MDFIC	flanking_3UTR	-129939	0.035
rs10494916	1	207312482	T	G	LOC391157	flanking_5UTR	-100453	0.035
rs924651	1	215312655	A	G	ESRRG	intron	-16817	0.035
rs185105	5	79906483	A	G	ANKRD34B	flanking_5UTR	-4629	0.035
rs12039248	1	88672448	T	G	PKN2	flanking_5UTR	-250396	0.035
rs4887606	16	34802728	A	G	FLJ26245	flanking_5UTR	-37001	0.035
rs11943687	4	143699177	A	G	INPP4B	flanking_5UTR	-127195	0.035
rs17712596	13	88586637	T	C	LOC121727	flanking_5UTR	-853054	0.035
rs514385	11	57062587	T	C	SMTNL1	flanking_5UTR	-2968	0.035
rs3795816	1	226747818	T	C	RNF187	intron	-220	0.035
rs865803	6	104620862	A	G	HACE1	flanking_3UTR	-661799	0.035
rs4947673	7	52022186	A	G	LOC642663	flanking_3UTR	-604229	0.035
rs1395579	16	7527735	A	G	A2BP1	intron	-19343	0.035
rs9343972	6	62255266	T	C	LOC727798	flanking_3UTR	-142833	0.035
rs632137	11	119752243	A	G	ARHGEF12	intron	-29794	0.035
rs12151501	2	29288145	A	G	ALK	intron	-1897	0.035
rs2924371	2	29291013	A	G	ALK	intron	-562	0.035
rs379803	5	16707960	T	G	MYO10	flanking_3UTR	-10453	0.035
rs876095	5	16709803	T	C	MYO10	flanking_3UTR	-8610	0.035

## Sheet: B-C
rsID	Chr	Position	Allele A	Allele B	Gene	Region	Position relative to gene	Fst values	Disease/Trait	PUBMEDID	GWAS Study
rs2116263	6	33133471	A	G	HLA-DPA1	flanking_3UTR	-7301	0.028
rs2353349	7	137784042	T	C	TRIM24	flanking_5UTR	-11577	0.026
rs4728435	7	137746234	T	G	LOC442727	flanking_5UTR	-6426	0.025
rs6969518	7	90235263	T	C	PFTK1	intron	-20237	0.025
rs2014078	4	160238942	T	C	RAPGEF2	flanking_5UTR	-5842	0.025
rs12331691	4	160182492	T	G	FLJ25371	flanking_5UTR	-6709	0.024
rs1151218	11	79678077	A	G	LOC646112	flanking_3UTR	-299751	0.024
rs11936468	4	20158074	T	C	SLIT2	intron	-1135	0.024
rs11232072	11	79703169	T	C	LOC646112	flanking_3UTR	-324843	0.024
rs6849580	4	160170440	A	G	FLJ25371	intron	-5195	0.024
rs1744359	5	157477894	A	G	LOC345471	flanking_5UTR	-130652	0.024
rs7431876	3	70328915	T	C	LOC654340	flanking_5UTR	-70459	0.024
rs359305	10	17380421	T	C	ST8SIA6	flanking_3UTR	-22261	0.023
rs6818877	4	183763522	A	G	ODZ3	intron	-4214	0.023
rs11159071	14	73752126	T	C	LIN52	flanking_3UTR	-16635	0.023
rs7692595	4	160347890	A	G	RAPGEF2	intron	-3212	0.023
rs7660477	4	160167630	A	G	FLJ25371	intron	-8005	0.023
rs2654535	15	95095237	T	G	LOC388181	flanking_5UTR	-5996	0.022
rs2539978	2	63048683	A	G	EHBP1	intron	-11144	0.022
rs991866	3	152907787	T	C	AADACL2	flanking_5UTR	-26618	0.022
rs1151207	11	79685662	A	C	LOC646112	flanking_3UTR	-307336	0.022
rs1448275	4	32726082	A	G	LOC642305	flanking_5UTR	-36320	0.022
rs4348690	1	244497256	A	G	SMYD3	intron	-59870	0.022
rs4306855	3	135201105	A	G	SLCO2A1	intron	-19953	0.022
rs9997385	4	160337908	A	G	RAPGEF2	intron	-4050	0.021
rs8182040	15	21569096	A	G	NDN	flanking_5UTR	-85553	0.021
rs3775827	4	20154412	A	G	SLIT2	intron	-1065	0.021
rs12662077	6	33009979	A	G	HLA-DMB	flanking_3UTR	-414	0.021
rs987870	6	33150858	T	C	HLA-DPB1	flanking_5UTR	-880	0.021	Systemic sclerosis	21779181	Identification of novel genetic markers associated with clinical phenotypes of systemic sclerosis through a genome-wide association strategy.
rs10514415	16	75947629	T	C	ADAMTS18	intron	-154	0.021
rs7149088	14	26690636	T	C	LOC728755	flanking_3UTR	-170236	0.021
rs7154679	14	26691701	A	C	LOC728755	flanking_3UTR	-169171	0.021
rs4732956	8	29395743	A	G	DUSP4	flanking_5UTR	-131639	0.021
rs7093277	10	13750903	A	G	FRMD4A	intron	-1509	0.021
rs17770042	16	75903312	A	G	ADAMTS18	intron	-7935	0.021
rs6680246	1	31460246	T	C	NKAIN1	flanking_5UTR	-26659	0.021
rs10062832	5	178177968	A	G	LOC729522	flanking_5UTR	-40	0.021
rs3790286	20	19603938	A	G	SLC24A3	intron	-1640	0.021
rs1733354	3	121582744	A	G	FSTL1	flanking_3UTR	-13072	0.021
rs1623323	3	121583340	T	C	FSTL1	flanking_3UTR	-12476	0.021
rs1157565	14	26692755	T	C	LOC728755	flanking_3UTR	-168117	0.021
rs1551425	3	192344554	A	G	OSTN	flanking_5UTR	-68462	0.021
rs2374334	7	90123410	A	G	PFTK1	flanking_5UTR	-53238	0.021
rs4599420	4	95927584	A	G	BMPR1B	intron	-29342	0.021
rs357367	7	137628911	A	C	LOC442727	flanking_3UTR	-110566	0.021
rs2562112	16	75948773	T	C	ADAMTS18	intron	-1298	0.021
rs2246607	16	75954668	A	G	ADAMTS18	intron	-532	0.021
rs4959611	6	182215	T	C	NULL	flanking_3UTR	-2485	0.02
rs11175947	12	64570603	T	C	HMGA2	intron	-24503	0.02
rs2913537	5	157471825	T	C	LOC345471	flanking_5UTR	-124583	0.02
rs1147683	3	121566544	T	C	LRRC58	flanking_5UTR	-13475	0.02
rs1650551	5	157473679	A	G	LOC345471	flanking_5UTR	-126437	0.02
rs11254314	10	17058324	T	C	CUBN	intron	-6165	0.02
rs2034371	4	32706259	A	G	LOC642305	flanking_5UTR	-16497	0.02
rs11132137	4	183762691	T	C	ODZ3	intron	-3383	0.02
rs6964856	7	90075767	T	C	PFTK1	flanking_5UTR	-100881	0.02
rs2353354	7	137916549	T	G	TRIM24	intron	-433	0.02
rs3759895	15	43331162	T	C	SLC28A2	flanking_5UTR	-564	0.02
rs869995	9	28014654	T	C	LINGO2	intron	-12251	0.02
rs7821547	8	13586150	A	G	C8orf48	flanking_3UTR	-115983	0.02
rs7937151	11	112340234	A	C	NCAM1	intron	-2638	0.02
rs17690505	7	90141721	A	G	PFTK1	flanking_5UTR	-34927	0.02
rs7318021	13	90008117	A	G	KRT18P27	flanking_3UTR	-326180	0.02
rs10856810	4	32732180	A	C	LOC642305	flanking_5UTR	-42418	0.02
rs4433125	8	144178876	A	G	LY6E	flanking_3UTR	-3677	0.02
rs11024326	11	17553957	A	G	OTOG	intron	-722	0.02
rs10924545	1	244431215	A	G	SMYD3	intron	-125911	0.02
rs12134404	1	244438767	T	C	SMYD3	intron	-118359	0.02
rs9982493	21	32171219	A	G	HUNK	intron	-3100	0.02
rs4245247	18	43838033	T	C	ZBTB7C	flanking_5UTR	-16541	0.02
rs1148711	1	244530925	A	G	SMYD3	intron	-26201	0.02
rs1522084	11	33762562	A	C	LOC646120	flanking_3UTR	-2611	0.02
rs4908691	1	7723190	A	G	CAMTA1	intron	-2061	0.02
rs7520468	1	31461399	A	G	NKAIN1	flanking_5UTR	-27812	0.02
rs2177147	3	70336872	T	C	LOC654340	flanking_5UTR	-78416	0.019
rs2071354	6	33152366	T	C	HLA-DPB1	intron	-470	0.019
rs7544003	1	31461675	T	C	NKAIN1	flanking_5UTR	-28088	0.019
rs974828	15	58642847	T	C	RORA	intron	-5050	0.019
rs1059779	7	72788447	A	G	ABHD11	coding	[64/28]	0.019
rs7678811	4	160460349	A	G	RAPGEF2	intron	-2600	0.019
rs7212001	17	40370410	A	G	LOC146909	intron	-1158	0.019
rs1148716	1	244532578	A	G	SMYD3	intron	-24548	0.019
rs1614336	5	157484446	T	G	LOC345471	flanking_5UTR	-137204	0.019
rs1479312	11	79659821	A	G	LOC646112	flanking_3UTR	-281495	0.019
rs13276958	8	141652078	T	C	EIF2C2	intron	-15	0.019
rs1160130	12	16689784	A	G	LMO3	flanking_5UTR	-37493	0.019
rs1357272	3	70337758	A	G	LOC654340	flanking_5UTR	-79302	0.019
rs12670755	7	15742914	A	G	LOC729909	flanking_5UTR	-26572	0.019
rs6690437	1	44360099	A	G	KLF17	intron	-2852	0.019
rs2372800	7	85043031	T	G	tcag7.1130	flanking_5UTR	-5853	0.019
rs13034994	2	15996086	A	G	MYCN	flanking_5UTR	-2048	0.019
rs8020630	14	73388426	T	C	ZADH1	5UTR	[2/150]	0.019
rs7786646	7	90299564	A	G	PFTK1	intron	-30862	0.019
rs7843004	8	51990326	A	G	SNTG1	flanking_3UTR	-122346	0.019
rs11780693	8	51997698	T	C	SNTG1	flanking_3UTR	-129718	0.019
rs7004019	8	52003072	T	G	SNTG1	flanking_3UTR	-135092	0.019
rs593300	6	84780354	T	C	C6orf117	flanking_5UTR	-19785	0.019
rs1191812	2	20088480	T	G	LAPTM4A	flanking_3UTR	-7414	0.019
rs2817458	6	156990541	T	G	ARID1B	flanking_5UTR	-150237	0.019
rs6031807	20	42869851	T	C	RIMS4	intron	-2379	0.019
rs887594	14	73755562	A	G	LIN52	flanking_3UTR	-20071	0.019
rs4899503	14	73753690	T	C	LIN52	flanking_3UTR	-18199	0.019
rs696944	1	206650153	A	C	PLXNA2	flanking_5UTR	-166414	0.019
rs9892593	17	58335701	T	C	LOC729667	flanking_3UTR	-46223	0.019
rs12629751	3	12374407	A	G	PPARG	intron	-6234	0.019
rs1540944	5	157499677	A	G	LOC345471	flanking_5UTR	-152435	0.019
rs4147416	7	85059862	A	C	tcag7.1130	flanking_5UTR	-22684	0.019
rs7244057	18	43833274	T	G	ZBTB7C	flanking_5UTR	-11782	0.019
rs2619206	11	79655019	T	C	LOC646112	flanking_3UTR	-276693	0.019
rs2888811	7	90225155	T	C	PFTK1	intron	-10129	0.018
rs1673206	7	137925274	A	G	SVOPL	flanking_3UTR	-4296	0.018
rs7068246	10	28504759	T	C	MPP7	intron	-25765	0.018
rs7681745	4	183763272	T	C	ODZ3	intron	-3964	0.018
rs8075339	17	40382401	A	G	LOC146909	flanking_5UTR	-1793	0.018
rs2934783	5	157487332	T	G	LOC345471	flanking_5UTR	-140090	0.018
rs10515758	5	157503797	T	C	LOC345471	flanking_5UTR	-156555	0.018
rs6956239	7	85183829	A	G	tcag7.1130	flanking_5UTR	-146651	0.018
rs10853220	18	12150236	A	G	LOC646065	flanking_3UTR	-31960	0.018
rs2292439	4	20156936	A	G	SLIT2	intron	-116	0.018
rs4301374	7	85062600	T	C	tcag7.1130	flanking_5UTR	-25422	0.018
rs10264125	7	85054208	A	G	tcag7.1130	flanking_5UTR	-17030	0.018
rs4728594	7	85055186	T	G	tcag7.1130	flanking_5UTR	-18008	0.018
rs2992907	13	94757902	T	C	ABCC4	flanking_5UTR	-6218	0.018
rs1369817	11	112433374	T	G	NCAM1	intron	-95778	0.018
rs1733331	3	121591859	T	G	FSTL1	flanking_3UTR	-3957	0.018
rs202927	14	26749592	T	C	LOC728755	flanking_3UTR	-111280	0.018
rs806711	19	5569654	A	G	SAFB2	intron	-2157	0.018
rs806702	19	5575290	A	C	SAFB	intron	-885	0.018
rs7678673	4	160358709	T	G	RAPGEF2	intron	-7524	0.018
rs4283616	4	160386758	A	G	RAPGEF2	intron	-2365	0.018
rs11208847	1	66638629	T	C	PDE4B	flanking_3UTR	-25779	0.018
rs923336	7	135328667	T	C	MTPN	flanking_5UTR	-16063	0.018
rs11784136	8	51975663	A	G	SNTG1	flanking_3UTR	-107683	0.018
rs7110863	11	112348348	T	C	NCAM1	intron	-10752	0.018
rs3859167	16	5868257	A	G	A2BP1	flanking_5UTR	-140876	0.018
rs326873	4	112952205	T	G	LOC729075	flanking_3UTR	-259487	0.018
rs6688451	1	52858628	A	G	GPX7	flanking_3UTR	-11318	0.018
rs3101531	8	107737708	A	G	OXR1	flanking_5UTR	-1562	0.018
rs1245463	14	26731490	A	G	LOC728755	flanking_3UTR	-129382	0.018
rs783435	1	66687713	A	G	PDE4B	flanking_3UTR	-74863	0.018
rs11245016	10	128202819	A	C	LOC728152	flanking_5UTR	-743	0.018
rs2341797	8	29387170	A	G	DUSP4	flanking_5UTR	-123066	0.018
rs10924987	1	245557766	A	G	ZNF496	intron	-842	0.018
rs2281388	6	33168096	A	G	LOC646702	UTR	[222/59]	0.018	Graves' disease	21841780	A genome-wide association study identifies two new risk loci for Graves' disease.
rs1648302	15	43281530	T	C	LOC729216	intron	-1001	0.018
rs4552469	4	95927562	T	C	BMPR1B	intron	-29320	0.018
rs326866	4	112958699	A	G	LOC132719	flanking_5UTR	-259391	0.018
rs326861	4	112971835	T	C	LOC132719	flanking_5UTR	-246255	0.018
rs11264160	1	35714521	A	G	KIAA0319L	intron	-1427	0.018
rs10891498	11	112426732	A	G	NCAM1	intron	-89136	0.018
rs7728102	5	74275132	T	C	GCNT4	flanking_3UTR	-83913	0.018
rs6438576	3	121540286	T	C	LRRC58	intron	-2796	0.018
rs6438578	3	121547859	T	C	LRRC58	intron	-2422	0.018
rs861256	11	33703909	T	C	CD59	intron	-3324	0.018
rs758989	7	44169531	T	C	GCK	intron	-4119	0.018
rs2326886	6	130329181	A	G	L3MBTL3	flanking_5UTR	-52246	0.018
rs1890582	6	159785747	A	G	LOC642738	flanking_3UTR	-81268	0.018
rs4444401	17	73836346	T	C	SOCS3	flanking_3UTR	-28108	0.018
rs10242197	7	90097848	T	C	PFTK1	flanking_5UTR	-78800	0.018
rs1245114	11	112455992	A	G	NCAM1	intron	-118396	0.018
rs11205983	1	52874721	T	C	MGC52498	intron	-2786	0.018
rs10952417	7	152732084	A	G	FLJ42291	flanking_3UTR	-7168	0.017
rs6996857	8	29397125	A	G	DUSP4	flanking_5UTR	-133021	0.017
rs3802030	7	90322514	T	G	PFTK1	intron	-7912	0.017
rs12662501	6	31298829	T	C	HCG27	flanking_3UTR	-19106	0.017
rs6750297	2	7373812	T	C	LOC644232	flanking_3UTR	-8518	0.017
rs8001444	13	94750438	T	C	ABCC4	intron	-1058	0.017
rs6731296	2	25488331	T	C	DTNB	intron	-7557	0.017
rs6956423	7	27999467	T	C	JAZF1	intron	-1342	0.017
rs3817442	11	33753984	T	C	FBXO3	flanking_5UTR	-1337	0.017
rs10504595	8	76738610	T	G	HNF4G	flanking_3UTR	-96987	0.017
rs6036350	20	2325538	T	C	TGM6	intron	-268	0.017
rs1590087	11	79650193	A	G	LOC646112	flanking_3UTR	-271867	0.017
rs1994464	7	135332959	T	C	MTPN	flanking_5UTR	-20355	0.017
rs1317790	10	28419610	T	C	MPP7	intron	-834	0.017
rs4396948	4	160428080	T	C	RAPGEF2	intron	-16864	0.017
rs706497	1	52887324	T	C	MGC52498	intron	-6062	0.017
rs3010301	6	139816546	A	G	hCG_1786283	flanking_3UTR	-15279	0.017
rs1577910	6	130337520	T	C	L3MBTL3	flanking_5UTR	-43907	0.017
rs17046971	4	166878087	T	C	LOC646995	flanking_3UTR	-71814	0.017
rs6702503	1	35780700	A	G	KIAA0319L	intron	-11838	0.017
rs710417	1	206644823	T	C	PLXNA2	flanking_5UTR	-161084	0.017
rs759002	7	51864247	T	C	LOC642663	flanking_3UTR	-446290	0.017
rs4713438	6	31254825	A	G	POU5F1	flanking_5UTR	-8393	0.017
rs12944446	17	8675465	A	C	C17orf38	intron	-1466	0.017
rs752150	19	62888019	T	C	ZNF551	intron	-423	0.017
rs2272064	11	33732370	A	G	FBXO3	intron	-207	0.017
rs10215689	7	51875326	T	C	LOC642663	flanking_3UTR	-457369	0.017
rs4601236	7	90078134	A	G	PFTK1	flanking_5UTR	-98514	0.017
rs6943415	7	90079043	A	G	PFTK1	flanking_5UTR	-97605	0.017
rs17865021	7	90085378	A	G	PFTK1	flanking_5UTR	-91270	0.017
rs11563523	7	90098268	A	G	PFTK1	flanking_5UTR	-78380	0.017
rs2961597	10	4879525	A	G	AKR1CL2	intron	-103	0.017
rs4436745	15	95070872	A	G	LOC388181	flanking_5UTR	-30361	0.017
rs6837073	4	181170341	A	C	LOC643179	flanking_3UTR	-561365	0.017
rs6080761	20	17577162	T	C	RRBP1	intron	-5390	0.017
rs1319374	4	93506767	A	G	GRID2	intron	-61849	0.017
rs6131920	20	17138191	A	C	PCSK2	flanking_5UTR	-17440	0.017
rs17863688	2	51820748	T	C	LOC730100	flanking_3UTR	-411669	0.017
rs1499575	1	206651975	T	C	PLXNA2	flanking_5UTR	-168236	0.017

## Sheet: B-D
rsID	Chr	Position	Allele A	Allele B	Gene	Region	Position relative to gene	Fst values	Disease/Trait	PUBMEDID	GWAS Study
rs1573221	10	18528471	A	G	CACNB2	intron	-48561	0.049
rs1994464	7	135332959	T	C	MTPN	flanking_5UTR	-20355	0.045
rs17150980	7	78011670	T	C	MAGI2	intron	-22772	0.043
rs923336	7	135328667	T	C	MTPN	flanking_5UTR	-16063	0.042
rs13103731	4	145275937	T	C	GYPA	intron	-5265	0.04
rs671	12	110726149	T	C	ALDH2	coding	[103/11]	0.04	Esophageal cancer	19698717	Functional variants in ADH1B and ALDH2 coupled with alcohol and smoking synergistically enhance esophageal cancer risk.
rs1528020	7	144698173	T	C	LOC643308	flanking_5UTR	-329206	0.04
rs7798155	7	144698672	T	G	LOC643308	flanking_5UTR	-329705	0.04
rs7554123	1	44776791	T	G	C1orf164	intron	-75633	0.04
rs1559497	2	30971562	A	G	GALNT14	flanking_3UTR	-15275	0.039
rs13360899	5	115087437	A	G	LOC728301	flanking_5UTR	-46745	0.039
rs4741967	9	4364278	T	C	LOC729691	flanking_5UTR	-74071	0.039
rs11750906	5	115095627	T	C	LOC728301	flanking_5UTR	-38555	0.039
rs10950521	7	14395875	T	C	DGKB	intron	-44334	0.038
rs6713110	2	230218474	A	G	DNER	intron	-53626	0.038
rs3782886	12	110594872	A	G	BRAP	coding	[24/89]	0.038
rs3131538	1	219654792	T	C	NULL	flanking_5UTR	-78531	0.038
rs4323245	5	169566421	A	G	LOC133874	flanking_5UTR	-26263	0.038
rs12582367	12	118040270	T	C	KIAA1853	intron	-1074	0.038
rs6966379	7	144693159	A	G	LOC643308	flanking_5UTR	-324192	0.037
rs6966516	7	144693404	A	G	LOC643308	flanking_5UTR	-324437	0.037
rs7535528	1	2434274	T	C	PANK4	coding	[87/64]	0.037
rs12453022	17	3786804	A	G	ATP2A3	intron	-292	0.037
rs1408051	13	21725752	T	C	FTHL7	flanking_5UTR	-442249	0.036
rs10239917	7	77993275	A	G	MAGI2	intron	-4377	0.036
rs8192431	15	70279406	T	C	PKM2	intron	-255	0.036
rs1277765	10	18537301	T	C	CACNB2	intron	-52403	0.036
rs6502762	17	3819013	A	G	ATP2A3	flanking_5UTR	-4528	0.036
rs2152727	13	22663601	A	G	SGCG	intron	-10387	0.035
rs10155818	7	135253628	T	C	MTPN	flanking_3UTR	-8421	0.035
rs4259254	6	156219826	A	G	NOX3	flanking_5UTR	-401097	0.035
rs2357958	7	14403342	T	C	DGKB	intron	-51801	0.035
rs103294	19	59489660	T	C	LILRA3	flanking_3UTR	-2006	0.035	Prostate cancer	23023329	Genome-wide association study in Chinese men identifies two new prostate cancer risk loci at 9q31.2 and 19q13.4.
rs9393672	6	25950584	A	C	SLC17A3	flanking_3UTR	-2723	0.035
rs4894797	3	173266240	A	G	FNDC3B	flanking_5UTR	-46696	0.035
rs16854367	1	203006138	T	C	NFASC	flanking_5UTR	-58308	0.035
rs665721	1	193379326	T	G	LOC647167	flanking_3UTR	-953231	0.035
rs4950752	1	200223050	A	G	RNPEP	intron	-1605	0.034
rs10868482	9	88567164	A	C	GAS1	flanking_3UTR	-181934	0.034
rs7117265	11	15307181	A	G	INSC	flanking_3UTR	-82983	0.034
rs4142515	7	135306640	T	C	MTPN	intron	-5677	0.034
rs765285	6	25936221	C	G	SLC17A1	intron	-1381	0.034
rs6453227	5	75840861	A	G	IQGAP2	intron	-47611	0.034
rs3753380	1	78729020	T	C	PTGFR	flanking_5UTR	-296	0.034
rs9552536	13	21364085	T	C	FGF9	flanking_3UTR	-189898	0.034
rs8097533	18	64215820	T	C	LOC653322	flanking_5UTR	-118068	0.034
rs7017161	8	121921861	A	G	SNTB1	flanking_5UTR	-27951	0.034
rs1037680	15	70301373	A	G	PKM2	intron	-2868	0.034
rs979607	17	34277845	A	G	LASP1	flanking_5UTR	-2049	0.033
rs12677236	8	3884261	A	G	CSMD1	intron	-7232	0.033
rs2523605	6	31431387	A	G	HLA-B	intron	-40	0.033
rs1411813	1	193370276	T	C	LOC647167	flanking_3UTR	-944181	0.033
rs587652	1	193373846	T	C	LOC647167	flanking_3UTR	-947751	0.033
rs9982493	21	32171219	A	G	HUNK	intron	-3100	0.033
rs1757200	10	18569841	A	G	CACNB2	intron	-19863	0.033
rs1025003	5	169577423	A	G	LOC133874	flanking_5UTR	-15261	0.033
rs3129963	6	32488186	T	C	BTNL2	flanking_5UTR	-5308	0.033
rs9491156	6	124762938	T	C	NKAIN2	intron	-44746	0.033
rs7327720	13	21742305	A	G	FTHL7	flanking_5UTR	-425696	0.033
rs17068729	8	3891414	T	C	CSMD1	intron	-14385	0.033
rs17168541	7	135332585	T	C	MTPN	flanking_5UTR	-19981	0.033
rs9273448	6	32735725	A	G	HLA-DQB1	3UTR	[83/265]	0.033
rs10194712	2	42795681	T	C	MTA3	flanking_3UTR	-5824	0.032
rs2074991	17	3785375	T	C	ATP2A3	intron	-55	0.032
rs7007426	8	121914461	T	C	SNTB1	flanking_5UTR	-20551	0.032
rs12516993	5	179503343	A	G	RASGEF1C	intron	-5679	0.032
rs10493763	1	85499806	A	G	C1orf52	flanking_5UTR	-1893	0.032
rs4921951	8	18580048	T	C	PSD3	intron	-22573	0.032
rs1362075	6	29590107	T	C	LOC729653	flanking_3UTR	-6783	0.032
rs3737002	1	205827396	T	C	CR1	coding	[42/137]	0.032
rs11587867	1	213073562	T	C	LOC391162	flanking_5UTR	-37138	0.032
rs2367303	12	74553748	T	C	LOC729520	flanking_5UTR	-89361	0.032
rs1165153	6	25925768	T	C	SLC17A1	intron	-1507	0.032
rs3094572	6	29588972	A	G	LOC729653	flanking_3UTR	-5648	0.031
rs3094564	6	29594324	T	C	LOC729653	flanking_3UTR	-11000	0.031
rs1185567	6	25926567	A	G	SLC17A1	intron	-708	0.031
rs4925811	8	145773255	A	C	KIAA1688	intron	-3783	0.031
rs598224	1	193399216	T	C	LOC647167	flanking_3UTR	-973121	0.031
rs7846371	8	3016816	A	C	CSMD1	intron	-9223	0.031
rs12481033	20	15750809	T	C	MACROD2	intron	-40581	0.031
rs4846812	1	215316073	T	G	ESRRG	intron	-13399	0.031
rs2312244	5	128493261	A	G	ISOC1	flanking_3UTR	-15531	0.031
rs957848	12	125685188	A	G	LOC387895	flanking_3UTR	-95436	0.031
rs781790	1	44749393	T	C	C1orf164	intron	-98412	0.031
rs9915261	17	3815487	A	G	ATP2A3	flanking_5UTR	-1002	0.031
rs3814303	1	35562994	T	C	ZMYM4	intron	-554	0.031
rs2885563	7	78001237	A	G	MAGI2	intron	-12339	0.031
rs1272551	1	213066142	A	G	LOC391162	flanking_5UTR	-44558	0.031
rs9847061	3	142924821	A	G	RNF7	flanking_5UTR	-14920	0.031
rs1881911	3	133265773	T	G	CPNE4	flanking_5UTR	-29239	0.031
rs17063211	8	3885567	A	G	CSMD1	intron	-8538	0.031
rs10503228	8	3885841	A	G	CSMD1	intron	-8812	0.031
rs7823658	8	3014100	A	C	CSMD1	intron	-6894	0.031
rs889108	19	38454961	T	C	CEBPA	flanking_3UTR	-27815	0.031
rs3805322	4	100276021	A	G	ADH4	intron	-619	0.031	Esophageal cancer (alcohol interaction)	22960999	Genome-wide association analyses of esophageal squamous cell carcinoma in Chinese identify multiple susceptibility loci and gene-environment interactions.
rs1165215	6	25906911	T	C	SLC17A1	intron	-79	0.03
rs1165196	6	25921129	A	G	SLC17A1	coding	[91/70]	0.03	Urate levels	20884846	Multiple genetic loci influence serum urate levels and their relationship with gout and cardiovascular disease risk factors.
rs12190516	6	96469325	T	C	KRT18P50	intron	-9258	0.03
rs10232894	7	135297491	A	G	MTPN	intron	-10573	0.03
rs7896607	10	18551924	A	C	CACNB2	intron	-37780	0.03
rs1165177	6	25937638	A	T	SLC17A1	intron	-1093	0.03
rs1165176	6	25938277	A	G	SLC17A1	intron	-454	0.03
rs11649670	16	24327847	T	G	CACNG3	flanking_3UTR	-46609	0.03
rs34518860	6	32702081	T	C	HLA-DQA1	flanking_5UTR	-14984	0.03
rs7206740	16	25994897	T	C	HMGN2P3	flanking_5UTR	-43132	0.03
rs9958590	18	64243196	T	C	LOC653322	flanking_5UTR	-145444	0.03
rs481796	18	64227448	T	C	LOC653322	flanking_5UTR	-129696	0.03
rs9953072	18	64211988	A	G	LOC653322	flanking_5UTR	-114236	0.03
rs8049852	16	13040014	T	C	LOC729993	flanking_5UTR	-43724	0.03
rs11869835	17	42736822	T	G	ITGB3	intron	-1617	0.03
rs764956	2	25696756	T	G	DTNB	intron	-7788	0.03
rs16856859	3	173267430	T	C	FNDC3B	flanking_5UTR	-45506	0.03
rs11609245	12	60371157	T	C	FAM19A2	flanking_3UTR	-17150	0.03
rs4850031	2	3608444	A	G	RPS7	flanking_3UTR	-2060	0.03
rs17143607	10	8493148	T	C	KRT8P16	flanking_3UTR	-102503	0.03
rs1345227	6	29574935	T	C	LOC729653	intron	-1640	0.03
rs4777467	15	69925532	T	C	MYO9A	intron	-2708	0.03
rs9393670	6	25897040	A	G	SLC17A1	intron	-5615	0.03
rs4292016	18	60019202	T	C	C18orf20	flanking_5UTR	-51958	0.03
rs2050406	20	16563735	A	G	C20orf23	flanking_5UTR	-61657	0.03
rs1353894	3	173290208	A	G	FNDC3B	flanking_5UTR	-22728	0.03
rs16865798	2	224902633	T	C	FAM124B	flanking_3UTR	-49026	0.03
rs1516808	18	64239192	A	G	LOC653322	flanking_5UTR	-141440	0.03
rs2799644	6	96464883	A	G	KRT18P50	intron	-4816	0.03
rs1476801	18	64212708	T	C	LOC653322	flanking_5UTR	-114956	0.03
rs696337	12	119643763	T	C	UNC119B	3UTR	[1544/2063]	0.03
rs2272955	20	43617912	T	C	WFDC8	coding	[158/9]	0.03
rs12680399	8	3887015	A	G	CSMD1	intron	-9986	0.03
rs11675522	2	3130664	A	G	LOC729897	flanking_5UTR	-2106	0.029
rs12347973	9	88570266	A	G	GAS1	flanking_3UTR	-178832	0.029
rs715120	12	119552736	A	C	CABP1	flanking_5UTR	-10069	0.029
rs4072374	2	3564846	A	G	LOC643517	flanking_5UTR	-5174	0.029
rs10491733	9	4473189	A	G	SLC1A1	flanking_5UTR	-7255	0.029
rs10877715	12	60383860	A	C	FAM19A2	flanking_3UTR	-4447	0.029
rs10485944	7	49385496	T	G	LOC727813	flanking_5UTR	-280710	0.029
rs10746786	9	88568087	A	G	GAS1	flanking_3UTR	-181011	0.029
rs12413082	10	23421428	T	C	MSRB2	flanking_5UTR	-3053	0.029
rs1340649	1	44693971	T	C	C1orf164	intron	-42990	0.029
rs2346662	2	200387403	T	C	LOC348751	intron	-29945	0.029
rs7454375	6	96463548	A	G	KRT18P50	intron	-3481	0.029
rs4782872	16	80986567	A	G	MPHOSPH6	flanking_5UTR	-225254	0.029
rs7976497	12	119619850	A	G	KIAA0152	3UTR	[1118/4200]	0.029
rs1204168	6	13944651	T	C	CCDC90A	flanking_5UTR	-21883	0.029
rs3795842	1	210866572	A	G	FAM71A	coding	[1729/55]	0.029
rs10182499	2	42796047	T	C	MTA3	flanking_3UTR	-6190	0.029
rs1427864	5	143017053	A	C	LOC345537	flanking_3UTR	-94837	0.029
rs12740505	1	18299618	T	C	IGSF21	flanking_5UTR	-7209	0.029
rs2200056	15	70089721	A	G	MYO9A	intron	-24	0.029
rs4777489	15	70217488	T	C	SENP8	intron	-1484	0.029
rs4776589	15	70346114	A	G	PARP6	intron	-26	0.029
rs6684439	1	152662463	T	C	IL6R	intron	-5833	0.029
rs1892894	11	119759894	A	G	ARHGEF12	intron	-22143	0.029
rs7933086	11	119774518	T	C	ARHGEF12	intron	-7519	0.029
rs4767921	12	119553584	A	G	CABP1	flanking_5UTR	-9221	0.029
rs10226661	7	49382253	A	G	LOC727813	flanking_5UTR	-283953	0.029
rs781770	1	44746706	T	C	C1orf164	intron	-95725	0.029
rs12120794	1	66731511	A	G	SGIP1	flanking_5UTR	-41042	0.029
rs1192560	1	18165350	T	C	ACTL8	flanking_3UTR	-139205	0.029
rs7532636	1	215294739	T	C	ESRRG	intron	-34733	0.029
rs2054601	15	69972022	T	C	MYO9A	intron	-1052	0.029
rs12906711	15	70002119	T	C	MYO9A	intron	-6232	0.029
rs4777478	15	70066139	A	G	MYO9A	intron	-4359	0.029
rs1570008	20	17306778	T	C	PCSK2	intron	-8856	0.029
rs6034810	20	17308298	A	G	PCSK2	intron	-10376	0.029
rs4293193	12	8198625	A	G	CLEC4A	flanking_3UTR	-16155	0.029
rs7317926	13	53073513	T	C	OLFM4	flanking_3UTR	-549320	0.029
rs897738	19	6852891	T	C	EMR1	coding	[5/141]	0.029
rs3814194	10	6253986	T	C	PFKFB3	flanking_5UTR	-30915	0.029
rs2249498	21	40353744	A	G	DSCAM	intron	-2922	0.029
rs3783785	14	61007045	A	G	PRKCH	intron	-12895	0.029
rs7765008	6	96476953	A	G	KRT18P50	intron	-16886	0.028
rs1416531	1	215274252	T	C	ESRRG	intron	-55220	0.028
rs12639914	4	183790270	A	G	ODZ3	intron	-3234	0.028
rs6857303	4	145255238	A	G	GYPA	intron	-54	0.028
rs17005366	3	69249046	T	C	LMOD3	intron	-1494	0.028
rs17074656	6	113432771	T	C	LOC643884	flanking_5UTR	-217290	0.028
rs1344667	12	11292457	T	C	PRB3	flanking_3UTR	-17667	0.028
rs727840	18	64199502	T	C	LOC653322	flanking_5UTR	-101750	0.028
rs1010444	18	64208012	A	G	LOC653322	flanking_5UTR	-110260	0.028
rs1554220	18	64237029	T	G	LOC653322	flanking_5UTR	-139277	0.028
rs6501822	17	71051226	T	C	LLGL2	intron	-49	0.028
rs526007	12	119570267	T	C	CABP1	intron	-2487	0.028
rs1165160	6	25972435	T	C	SLC17A3	intron	-1784	0.028
rs1165207	6	25973245	T	C	SLC17A3	intron	-2594	0.028
rs3923903	7	219039	A	G	FAM20C	flanking_5UTR	-69157	0.028
rs10518979	15	70056040	A	G	MYO9A	intron	-1526	0.028
rs2306488	15	70079169	T	C	MYO9A	intron	-77	0.028
rs2282854	6	112638353	A	G	LAMA4	intron	-3314	0.028
rs1028829	14	46816036	T	C	MDGA2	intron	-24328	0.028
rs10133677	14	46816730	A	G	MDGA2	intron	-23634	0.028
rs894839	11	119842915	T	C	ARHGEF12	intron	-198	0.028
rs902491	9	116148486	A	G	AKNA	intron	-284	0.028
rs6999296	8	6158732	T	G	MCPH1	flanking_5UTR	-117748	0.028
rs10848856	12	3321534	A	G	LOC728230	flanking_5UTR	-23770	0.028
rs370094	19	6855137	T	C	EMR1	coding	[90/56]	0.028
rs2139266	3	142009170	T	C	LOC646685	flanking_5UTR	-94556	0.028
rs7992940	13	27921921	A	C	FLT1	intron	-11439	0.028
rs1165205	6	25978521	T	A	SLC17A3	intron	-1894	0.028	Urate levels	18834626	Association of three genetic loci with uric acid concentration and risk of gout: a genome-wide association study.
rs1074330	15	70037795	T	C	MYO9A	intron	-1501	0.028
rs12592364	15	70071701	T	G	MYO9A	intron	-1069	0.028

## Sheet: C-D
rsID	Chr	Position	Allele A	Allele B	Gene	Region	Position relative to gene	Fst values	Disease/Trait	PUBMEDID	GWAS Study
rs8192431	15	70279406	T	C	PKM2	intron	-255	0.046
rs2625530	15	69913088	A	G	MYO9A	intron	-3382	0.045
rs1037680	15	70301373	A	G	PKM2	intron	-2868	0.044
rs1074330	15	70037795	T	C	MYO9A	intron	-1501	0.042
rs2200056	15	70089721	A	G	MYO9A	intron	-24	0.042
rs4777489	15	70217488	T	C	SENP8	intron	-1484	0.042
rs1559497	2	30971562	A	G	GALNT14	flanking_3UTR	-15275	0.042
rs2054601	15	69972022	T	C	MYO9A	intron	-1052	0.041
rs12906711	15	70002119	T	C	MYO9A	intron	-6232	0.041
rs10518979	15	70056040	A	G	MYO9A	intron	-1526	0.041
rs4777478	15	70066139	A	G	MYO9A	intron	-4359	0.041
rs12592364	15	70071701	T	G	MYO9A	intron	-1069	0.041
rs2306488	15	70079169	T	C	MYO9A	intron	-77	0.041
rs12903484	15	70086535	T	C	MYO9A	intron	-686	0.041
rs7172309	15	70171537	T	C	MYO9A	intron	-25538	0.041
rs671	12	110726149	T	C	ALDH2	coding	[103/11]	0.041	Esophageal cancer	19698717	Functional variants in ADH1B and ALDH2 coupled with alcohol and smoking synergistically enhance esophageal cancer risk.
rs4777467	15	69925532	T	C	MYO9A	intron	-2708	0.04
rs4776589	15	70346114	A	G	PARP6	intron	-26	0.04
rs16854367	1	203006138	T	C	NFASC	flanking_5UTR	-58308	0.04
rs4905899	14	99354933	T	C	EML1	intron	-25300	0.039
rs7174776	15	25089282	A	G	GABRG3	flanking_5UTR	-310109	0.038
rs3782886	12	110594872	A	G	BRAP	coding	[24/89]	0.037
rs2035379	15	70080256	A	G	MYO9A	intron	-921	0.037
rs4905897	14	99345166	T	C	EML1	intron	-15533	0.037
rs10141863	14	99346460	A	G	EML1	intron	-16827	0.037
rs817232	6	101519970	A	G	LOC728098	flanking_3UTR	-74309	0.036
rs2278170	11	4453422	A	G	OR52K1	flanking_5UTR	-13285	0.036	Amyotrophic lateral sclerosis	22470424	A high-density genome-wide association screen of sporadic ALS in US veterans.
rs666462	6	44313005	T	C	SLC29A1	flanking_3UTR	-3149	0.035
rs4713462	6	31455795	T	C	LOC729816	flanking_5UTR	-13141	0.035
rs4713460	6	31455777	A	G	LOC729816	flanking_5UTR	-13123	0.034
rs6661776	1	11734714	T	C	AGTRAP	flanking_3UTR	-1299	0.034
rs4950752	1	200223050	A	G	RNPEP	intron	-1605	0.034
rs7402129	15	25089781	A	G	GABRG3	flanking_5UTR	-309610	0.033
rs17428931	4	38365437	T	C	KLF3	intron	-1164	0.033
rs7017897	8	68604153	A	C	CPA6	intron	-11317	0.033
rs7831538	8	68608293	T	C	CPA6	intron	-15457	0.033
rs9841500	3	107066756	T	C	CBLB	intron	-2188	0.033
rs2766581	6	35858277	T	C	LOC340204	intron	-1313	0.033
rs4837494	9	119475962	T	C	TLR4	flanking_5UTR	-30469	0.033
rs9295529	6	22077215	A	G	LOC729167	flanking_3UTR	-11460	0.033
rs526007	12	119570267	T	C	CABP1	intron	-2487	0.033
rs13060223	3	106978531	T	G	CBLB	intron	-455	0.032
rs769315	3	107003715	A	G	CBLB	intron	-25639	0.032
rs4323245	5	169566421	A	G	LOC133874	flanking_5UTR	-26263	0.032
rs11150643	16	31750349	T	G	ZNF267	flanking_5UTR	-42306	0.032
rs4240589	6	101533480	A	G	LOC728098	flanking_3UTR	-87819	0.032
rs873649	6	101544070	A	G	LOC728098	flanking_3UTR	-98409	0.032
rs9847061	3	142924821	A	G	RNF7	flanking_5UTR	-14920	0.032
rs2236620	22	22552710	T	C	SLC2A11	intron	-1936	0.032
rs11677044	2	235264642	A	C	ARL4C	flanking_5UTR	-194210	0.032
rs1492336	12	39295452	T	G	NULL	flanking_3UTR	-44631	0.032
rs890836	5	175897089	T	C	RNF44	flanking_5UTR	-62	0.032
rs6782206	3	107027788	T	C	CBLB	intron	-27160	0.032
rs6734073	2	64279888	T	G	PELI1	flanking_5UTR	-86901	0.032
rs12879129	14	99365171	T	G	EML1	intron	-21772	0.032
rs7004029	8	145916846	T	C	ZNF251	flanking_3UTR	-31294	0.031
rs4767921	12	119553584	A	G	CABP1	flanking_5UTR	-9221	0.031
rs4544975	7	3351910	T	G	SDK1	intron	-43868	0.031
rs900542	15	69869678	A	G	THSD4	flanking_3UTR	-6902	0.031
rs2330539	5	30808615	A	G	LOC391774	flanking_5UTR	-280770	0.031
rs3923903	7	219039	A	G	FAM20C	flanking_5UTR	-69157	0.031
rs2147905	1	2472781	A	G	TNFRSF14	flanking_3UTR	-6369	0.031
rs7208708	17	9990566	T	C	GAS7	intron	-51684	0.031
rs7554123	1	44776791	T	G	C1orf164	intron	-75633	0.03
rs1585367	6	63946085	A	G	GLULD1	flanking_3UTR	-101430	0.03
rs870904	2	37943891	T	C	LOC344382	flanking_3UTR	-45283	0.03
rs665721	1	193379326	T	G	LOC647167	flanking_3UTR	-953231	0.03
rs715120	12	119552736	A	C	CABP1	flanking_5UTR	-10069	0.03
rs7835925	8	63557344	T	C	NKAIN3	intron	-97308	0.03
rs3789184	5	169611615	T	C	LCP2	intron	-401	0.03
rs4485945	5	30767780	T	G	LOC391774	flanking_5UTR	-321605	0.03
rs3734703	6	44309712	A	C	SLC29A1	3UTR	[468/144]	0.03
rs12564900	1	15882443	A	G	PLEKHM2	intron	-934	0.03
rs3129963	6	32488186	T	C	BTNL2	flanking_5UTR	-5308	0.03
rs12884681	14	105138663	A	G	IGHE	intron	-70	0.03
rs2455253	5	36518797	T	C	SLC1A3	flanking_5UTR	-123649	0.03
rs13156095	5	132674601	A	G	FSTL4	intron	-1644	0.03
rs9358803	6	24927426	A	G	C6orf32	flanking_3UTR	-20140	0.03
rs561038	18	63695572	T	C	DSEL	flanking_5UTR	-360625	0.03
rs260415	19	63407756	A	G	ZNF274	intron	-2143	0.03
rs875643	22	22563998	A	G	MIF	flanking_5UTR	-2567	0.03
rs1025003	5	169577423	A	G	LOC133874	flanking_5UTR	-15261	0.029
rs2461507	12	119568652	T	C	CABP1	intron	-4102	0.029
rs760370	6	44308931	T	C	SLC29A1	intron	-201	0.029
rs4925811	8	145773255	A	C	KIAA1688	intron	-3783	0.029
rs170098	14	61462976	T	C	SYT16	flanking_5UTR	-69515	0.029
rs4737845	8	68617496	A	G	CPA6	intron	-24660	0.029
rs1411813	1	193370276	T	C	LOC647167	flanking_3UTR	-944181	0.029
rs587652	1	193373846	T	C	LOC647167	flanking_3UTR	-947751	0.029
rs17110817	14	80120188	T	C	C14orf145	intron	-3668	0.029
rs17110831	14	80125758	T	G	C14orf145	intron	-9238	0.029
rs2236621	22	22552744	A	G	SLC2A11	intron	-1902	0.029
rs6764799	3	106876990	A	G	CBLB	intron	-2975	0.029
rs1550712	3	106880737	T	C	CBLB	intron	-632	0.029
rs4956344	4	142199690	T	C	RNF150	intron	-73239	0.029
rs9469312	6	33001267	T	C	HLA-DMB	flanking_3UTR	-9126	0.029
rs9501239	6	33003558	T	C	HLA-DMB	flanking_3UTR	-6835	0.029
rs2174233	3	107134337	A	G	CBLB	flanking_5UTR	-63760	0.029
rs1544608	12	5683795	T	G	TMEM16B	intron	-28152	0.029
rs598224	1	193399216	T	C	LOC647167	flanking_3UTR	-973121	0.029
rs4236326	7	3366631	A	G	SDK1	intron	-58589	0.029
rs9869645	3	120445316	T	C	B4GALT4	flanking_5UTR	-2874	0.028
rs2688515	3	197011868	T	C	MUC4	intron	-9105	0.028
rs2641773	3	197012623	T	G	MUC4	intron	-9860	0.028
rs6917195	6	101384647	A	G	ASCC3	intron	-18098	0.028
rs1265883	1	158731535	A	C	SLAMF6	intron	-940	0.028
rs10868482	9	88567164	A	C	GAS1	flanking_3UTR	-181934	0.028
rs1573221	10	18528471	A	G	CACNB2	intron	-48561	0.028
rs1881302	12	39267898	A	C	NULL	flanking_3UTR	-17077	0.028
rs2707249	2	37938064	T	C	LOC344382	flanking_3UTR	-39456	0.028
rs226999	14	22048417	A	G	TRAJ32	flanking_3UTR	-187	0.028
rs7037542	9	119466039	A	G	TLR4	flanking_5UTR	-40392	0.028
rs7317926	13	53073513	T	C	OLFM4	flanking_3UTR	-549320	0.028
rs9287580	2	235264815	T	C	ARL4C	flanking_5UTR	-194383	0.028
rs6085691	20	683858	T	C	C20orf54	flanking_3UTR	-4866	0.028
rs10782879	1	102481105	T	C	OLFM3	flanking_5UTR	-245969	0.028
rs9869035	3	138420721	A	G	NULL	flanking_3UTR	-208111	0.028
rs2516705	6	30337673	T	G	FLJ45422	intron	-214	0.028
rs194679	6	32999316	A	G	HLA-DMB	flanking_3UTR	-11077	0.028
rs11032345	11	4440254	T	C	OR52K2	flanking_3UTR	-12164	0.028
rs11032361	11	4444806	A	G	OR52K2	flanking_3UTR	-16716	0.028
rs7835901	8	63557252	T	G	NKAIN3	intron	-97400	0.028
rs9296059	6	33001080	A	C	HLA-DMB	flanking_3UTR	-9313	0.028
rs12577389	11	107178633	T	C	SLC35F2	intron	-304	0.028
rs1116029	6	33003962	T	C	HLA-DMB	flanking_3UTR	-6431	0.028
rs4752979	11	47295756	A	G	MADD	intron	-2302	0.028
rs4757317	11	15400764	A	C	INSC	flanking_3UTR	-176566	0.028
rs11172184	12	56049787	T	C	INHBC	flanking_5UTR	-65023	0.028
rs10022231	4	94943063	T	G	ATOH1	flanking_5UTR	-26038	0.028
rs16981330	20	19863251	T	G	RIN2	intron	-492	0.028
rs1722659	2	161533247	T	C	TANK	flanking_5UTR	-168465	0.028
rs1956150	14	39258637	A	C	FBXO33	flanking_5UTR	-287266	0.028
rs9460196	6	170625272	A	G	PSMB1	flanking_3UTR	-60862	0.028
rs10079401	5	30761174	T	C	LOC391774	flanking_5UTR	-328211	0.028
rs103294	19	59489660	T	C	LILRA3	flanking_3UTR	-2006	0.028	Prostate cancer	23023329	Genome-wide association study in Chinese men identifies two new prostate cancer risk loci at 9q31.2 and 19q13.4.
rs1857951	16	7590679	A	G	A2BP1	intron	-3245	0.027
rs13360899	5	115087437	A	G	LOC728301	flanking_5UTR	-46745	0.027
rs7647186	3	69623185	T	C	LOC642487	flanking_3UTR	-44315	0.027
rs11780345	8	23107911	A	G	TNFRSF10A	intron	-2440	0.027
rs4710187	6	167475082	A	G	CCR6	flanking_3UTR	-2463	0.027
rs13212670	6	22077474	T	C	LOC729167	flanking_3UTR	-11201	0.027
rs4719894	7	3348315	A	G	SDK1	intron	-40273	0.027
rs924742	8	68627201	A	G	CPA6	intron	-34365	0.027
rs6781302	3	152638310	T	C	IGSF10	coding	[1143/765]	0.027
rs4743923	9	95290882	T	C	FAM120A	intron	-8692	0.027
rs1883448	6	15985706	T	C	LOC441131	flanking_5UTR	-57286	0.027
rs16981333	20	19864144	T	C	RIN2	intron	-301	0.027
rs433285	6	15960944	T	C	LOC441131	flanking_5UTR	-82048	0.027
rs4244535	11	28414313	A	G	METT5D1	flanking_3UTR	-102794	0.027
rs4286835	7	3366989	T	G	SDK1	intron	-58947	0.027
rs250145	16	78214847	T	C	MAF	flanking_5UTR	-22735	0.027
rs10045690	5	30739691	T	C	LOC391774	flanking_5UTR	-349694	0.027
rs3749713	5	53879602	A	G	SNAG1	flanking_3UTR	-28176	0.027
rs7296888	12	103291133	T	C	TXNRD1	flanking_3UTR	-22941	0.027
rs11869026	17	43039650	T	C	NPEPPS	intron	-1733	0.027
rs8048741	16	31665746	A	G	ZNF720	intron	-6842	0.027
rs1028829	14	46816036	T	C	MDGA2	intron	-24328	0.027
rs1397202	7	97206943	T	C	TAC1	intron	-179	0.027
rs1996490	3	117794581	A	G	LOC151579	flanking_3UTR	-50825	0.027
rs2641772	3	197016238	T	C	MUC4	intron	-6766	0.027
rs842460	3	197020437	A	G	MUC4	intron	-2567	0.027
rs1458423	6	78374569	A	G	HTR1B	flanking_5UTR	-144730	0.027
rs4753817	11	107169879	T	C	SLC35F2	intron	-1143	0.027
rs11961569	6	32972659	T	G	PSMB9	flanking_3UTR	-37053	0.027
rs11969321	6	32972868	G	C	PSMB9	flanking_3UTR	-37262	0.027
rs17508331	6	32973316	T	C	HLA-DMB	flanking_3UTR	-37077	0.027
rs9501233	6	32975101	A	G	HLA-DMB	flanking_3UTR	-35292	0.027
rs9461818	6	32975837	T	C	HLA-DMB	flanking_3UTR	-34556	0.027
rs10080898	6	32977860	A	C	HLA-DMB	flanking_3UTR	-32533	0.027
rs9296057	6	32977893	A	G	HLA-DMB	flanking_3UTR	-32500	0.027
rs1591	6	32979295	T	G	HLA-DMB	flanking_3UTR	-31098	0.027
rs1585894	6	32983301	A	C	HLA-DMB	flanking_3UTR	-27092	0.027
rs9501234	6	32984027	A	G	HLA-DMB	flanking_3UTR	-26366	0.027
rs9500926	6	32984492	T	C	HLA-DMB	flanking_3UTR	-25901	0.027
rs1978030	6	32985051	T	C	HLA-DMB	flanking_3UTR	-25342	0.027
rs386542	6	32985746	A	T	HLA-DMB	flanking_3UTR	-24647	0.027
rs154986	6	32987211	T	G	HLA-DMB	flanking_3UTR	-23182	0.027
rs7957299	12	109486694	T	C	PPTC7	intron	-12538	0.027
rs12576153	11	129509323	T	C	APLP2	intron	-490	0.027
rs10214886	6	32965397	T	A	PSMB9	flanking_3UTR	-29791	0.026	Disc degeneration (lumbar)	22993228	Novel genetic variants associated with lumbar disc degeneration in northern Europeans: a meta-analysis of 4600 subjects.
rs1915983	7	3375515	T	C	SDK1	intron	-67473	0.026
rs149392	6	32997949	T	C	HLA-DMB	flanking_3UTR	-12444	0.026
rs7192965	16	7592155	A	C	A2BP1	intron	-4721	0.026
rs2321299	2	134350130	T	C	NULL	flanking_5UTR	-307629	0.026
rs9381299	6	44319845	T	C	HSP90AB1	flanking_5UTR	-2982	0.026
rs6462040	7	3369000	A	C	SDK1	intron	-60958	0.026
rs10262464	7	3373487	A	C	SDK1	intron	-65445	0.026
rs12406199	1	107101035	T	G	PRMT6	flanking_5UTR	-299897	0.026
rs386893	3	155397592	A	G	SGEF	intron	-2395	0.026
rs7535528	1	2434274	T	C	PANK4	coding	[87/64]	0.026
rs684174	3	184394976	T	C	MCF2L2	intron	-728	0.026
rs4148152	4	89279933	T	C	ABCG2	intron	-36	0.026
rs7791343	7	3383306	A	C	SDK1	intron	-75264	0.026
rs10133677	14	46816730	A	G	MDGA2	intron	-23634	0.026
rs2899998	14	46822913	T	C	MDGA2	intron	-17451	0.026
rs7339397	13	111558904	T	G	LOC729095	flanking_3UTR	-199239	0.026
rs6984390	8	19648218	T	G	ChGn	flanking_5UTR	-63844	0.026
rs10257982	7	3301123	A	G	SDK1	flanking_5UTR	-6483	0.026
rs11774592	8	9858434	A	C	LOC729546	flanking_3UTR	-59218	0.026
rs935965	4	918684	T	C	TMEM175	intron	-2356	0.026
